# Supplementary material for: Smartphone screen testing, a novel pre-diagnostic method to identify SARS-CoV-2 infectious individuals
Source: eLife journal article supplement (doi:10.7554/elife.70333), 2021-06-22
Supplement: supp [file elife-70333-supp-v1.zip]

Archive with 6 entries (6 files):
- elife_poa_e70333_Figure_1_figure_supplement_1.png
- elife_poa_e70333_Figure_2_figure_supplement_2.png
- elife_poa_e70333_Source_data_1.xlsx
- elife_poa_e70333_Source_data_2.xlsx
- elife_poa_e70333_Source_data_3.xlsx
- elife_poa_e70333_Transparent_Reporting_File.pdf
