# Supplementary material for: Smartphone screen testing, a novel pre-diagnostic method to identify SARS-CoV-2 infectious individuals
Source: eLife journal article supplement (doi:10.7554/elife.70333), 2021-06-22
Supplement: supp [file elife-70333-supp-v1.zip › elife_poa_e70333_Source_data_1.xlsx]

## Sheet: Table 1 - 2020 cohort
Table 1 - Phone screen testing (PoST), in colaboration with Dávila Clinic, Santiago, Chile.
2020 cohort											n = 57
Sample	Clinical CT	PoST Ct	Age range	Sex	COVID-19 Symptoms			Symptoms Score	Symptoms resume	Smartphone cleaning habit	Last smartphone cleaning
					Fever	Continuous Cough	Anosmia and/or Ageusia
1	32.1	ND	[21-30]	M		X		1	Symptomatic	NA	NA
2	16.13	36.42	[21-30]	F				0	Asymptomatic	NA	NA
3	ND	37.4	[21-30]	M				0	Asymptomatic	NA	NA
4	18.02	30.12	[51-60]	F				0	Asymptomatic	NA	NA
5	21.78	36.46	[51-60]	F				0	Asymptomatic	NA	NA
6	17.63	30.73	[41-50]	M	X	X		2	Symptomatic	NA	NA
7	22.53	35.31	[41-50]	M		X		1	Symptomatic	NA	NA
8	18.6	30.9	[31-40]	F				0	Asymptomatic	NA	NA
9	17.95	32.71	[21-30]	F				0	Asymptomatic	NA	NA
10	15.03	35.31	[71-80]	M				0	Asymptomatic	NA	NA
11	36.3	ND	[51-60]	F		X	X	2	Symptomatic	NA	NA
12	36.39	ND	[41-50]	F				0	Asymptomatic	Yes	NA
13	21.59	44.4	[41-50]	M		X		1	Symptomatic	Yes	NA
14	20.42	37.17	[71-80]	M				0	Asymptomatic	No	n/a
15	18.04	36.26	[41-50]	M		X		1	Symptomatic	Yes	NA
16	36.03	ND	[21-30]	M				0	Asymptomatic	Yes	NA
17	36.03	ND	[21-30]	F				0	Asymptomatic	Yes	NA
18	35.76	ND	[21-30]	F			X	1	Symptomatic	Yes	NA
19	ND	40.6	[61-70]	M	X	X		2	Symptomatic	Yes	NA
20	38.78	ND	[41-50]	F				0	Asymptomatic	Yes	NA
21	38.67	ND	[31-40]	M				0	Asymptomatic	Yes	NA
22	26.5	37.3	[21-30]	F				0	Asymptomatic	No	n/a
23	32.88	ND	[61-70]	M				0	Asymptomatic	No	n/a
24	35.66	ND	[31-40]	M			X	1	Symptomatic	NA	NA
25	37.76	38.44	[31-40]	M	X			1	Symptomatic	NA	NA
26	37.32	38.44	[21-30]	M				0	Asymptomatic	NA	NA
27	37.94	ND	[41-50]	M			X	1	Symptomatic	NA	NA
28	35.44	ND	[21-30]	M				0	Asymptomatic	NA	NA
29	23.9	39.49	[31-40]	M			X	1	Symptomatic	NA	NA
30	38.69	ND	[21-30]	F			X	1	Symptomatic	Yes	NA
31	18.44	33.73	[21-30]	F				0	Asymptomatic	Yes	NA
32	18.79	33.23	[31-40]	F				0	Asymptomatic	Yes	NA
33	36.74	33.33	[61-70]	M		X		1	Symptomatic	Yes	NA
34	ND	38.13	[21-30]	M				0	Asymptomatic	No	NA
35	19.12	31.74	[41-50]	M				0	Asymptomatic	No	NA
36	33.53	ND	[41-50]	F				0	Asymptomatic	Yes	NA
37	ND	28	[21-30]	M				0	Asymptomatic	No	n/a
38	ND	21.64	[51-60]	H				0	Asymptomatic	Yes	NA
39	22.49	37.29	[31-40]	M				0	Asymptomatic	NA	NA
40	17.5	27.59	[41-50]	M				0	Asymptomatic	Yes	NA
41	35.07	ND	[10-20]	M				0	Asymptomatic	Yes	NA
42	16.75	36.27	[61-70]	F				0	Asymptomatic	Yes	NA
43	20.07	ND	[21-30]	F	X			1	Symptomatic	Yes	NA
44	18.79	36.3	[21-30]	F				0	Asymptomatic	No	n/a
45	36.58	ND	[31-40]	M	X			1	Symptomatic	Yes	NA
46	19.97	28.86	[21-30]	F				0	Asymptomatic	Yes	[2h - 12h]
47	ND	34.51	[31-40]	M				0	Asymptomatic	NA	NA
48	29.95	ND	[41-50]	M				0	Asymptomatic	No	n/a
49	35.14	ND	[31-40]	F				0	Asymptomatic	Yes	[0h - 1h]
50	20.38	39.92	[31-40]	M				0	Asymptomatic	No	n/a
51	22.36	36.34	[31-40]	F				0	Asymptomatic	No	n/a
52	35.74	ND	[21-30]	M				0	Asymptomatic	No	n/a
53	37.97	ND	[21-30]	M				0	Asymptomatic	No	n/a
54	22.19	34.83	[31-40]	F				0	Asymptomatic	No	n/a
55	24,84	39.17	[51-60]	F				0	Asymptomatic	No	n/a
56	24.64	ND	[41-50]	F				0	Asymptomatic	Yes	> 24h
57	17.12	39.22	[41-50]	M				0	Asymptomatic	Yes	[2h - 12h]
ND	Not determined
NA	Not available
n/a	Not applyed
Analysis of PoST sensitivity for different thresholds of nasopharyngeal Ct of pilot cohort
Ct thresholds	Nº of NF-PCR	Nº of PoST	Sensitivity
[0-13[	0	0
[0-15[	1	1	1
[0-17[	3	3	1
[0-19[	13	13	1
[0-21[	18	17	0.944444
[0-23[	24	23	0.958333
[0-25[	27	25	0.925926
[0-27[	28	26	0.928571
[0-29[	28	26	0.928571
[0-31[	29	26	0.896552
[0-33[	31	26	0.83871
[0-35[	32	26	0.8125
[0-37[	44	27	0.613636
[0-39[	51	29	0.568627
[0-41[	51	29	0.568627
Two-by-two tables for sensitivity and specificity of PoST method compared to nasopharyngeal RT-PCR
	NF-PCR	PoST	Acc %	NF-PCR + / PoST -				NF - PCR
0-20	15	15	1	0				(+)	(-)
20-30	14	11	0.896552	3		PoST	(+)	29	6	35
30-40	22	3	0.568627	19			(-)	22	483	505
False Post+		6						51	489	540
	51	35								*540, Total of individuals sampled from September to October 2020
Specificity	0.98773
Sensitivity	1	When viral loads are high (Ct≤ 20)
