# Supplementary material for: Smartphone screen testing, a novel pre-diagnostic method to identify SARS-CoV-2 infectious individuals
Source: eLife journal article supplement (doi:10.7554/elife.70333), 2021-06-22
Supplement: supp [file elife-70333-supp-v1.zip › elife_poa_e70333_Source_data_2.xlsx]

## Sheet: Table 2 - 2021 cohort
Table 2 - Phone screen testing (PoST), in colaboration with Dávila Clinic, Santiago, Chile.
Validation cohort											n = 196
Sample	Clinical CT	PoST Ct	Age range	Sex	COVID-19 Symptoms			Symptoms Score	Symptoms resume	Smartphone cleaning habit	Last smartphone cleaning
					Fever	Continuous Cough	Anosmia and/or Ageusia
1	38.28	ND	[41-50]	M				0	Asymptomatic	Yes	[2h - 12h]
2	21.25	ND	[31-40]	M	X			1	Symptomatic	No	n/a
3	14.38	35.9	[51-60]	M	X	X		2	Symptomatic	No	n/a
4	19.44	ND	[31-40]	F				0	Asymptomatic	No	n/a
5	15.29	35.91	[21-30]	F				0	Asymptomatic	No	n/a
6	15.62	31.5	[21-30]	F	X	X	X	3	Symptomatic	No	n/a
7	17.29	ND	[51-60]	M	X			1	Symptomatic	No	n/a
8	23.46	37.69	[31-40]	M		X		1	Symptomatic	No	n/a
9	15.01	39.99	[31-40]	M				0	Asymptomatic	No	n/a
10	16.93	38.3	[21-30]	M				0	Asymptomatic	Yes	[0h - 1h]
11	27.42	ND	[21-30]	M				0	Asymptomatic	No	n/a
12	22.5	ND	[41-50]	M	X			1	Symptomatic	Yes	[2h - 12h]
13	23.83	ND	[41-50]	M	X	X		2	Symptomatic	No	n/a
14	31.78	ND	[21-30]	F			X	1	Symptomatic	No	n/a
15	ND	35.76	[31-40]	F		X		1	Symptomatic	No	n/a
16	21.23	35.75	[21-30]	M		X	X	2	Symptomatic	Yes	> 24h
17	19.1	35.4	[51-60]	M			X	1	Symptomatic	Yes	> 24h
18	36.88	ND	[61-70]	M				0	Asymptomatic	Yes	[2h - 12h]
19	17.75	ND	[41-50]	F	X	X	X	3	Symptomatic	Yes	> 24h
20	19.22	35.93	[21-30]	F	X	X	X	3	Symptomatic	Yes	> 24h
21	16.63	35.09	[41-50]	M				0	Asymptomatic	Yes	[2h - 12h]
22	16.88	38.19	[21-30]	M		X		1	Symptomatic	Yes	> 24h
23	26.74	36.05	[31-40]	M	X	X	X	3	Symptomatic	Yes	> 24h
24	34.17	ND	[21-30]	M				0	Asymptomatic	No	n/a
25	17.81	ND	[51-60]	M				0	Asymptomatic	Yes	> 24h
26	17.38	35.11	[41-50]	M				0	Asymptomatic	No	n/a
27	18.6	38.52	[51-60]	M				0	Asymptomatic	NA	NA
28	12.47	31.57	[51-60]	F				0	Asymptomatic	No	n/a
29	17.11	33.96	[21-30]	M				0	Asymptomatic	Yes	> 24h
30	22.56	ND	[31-40]	F				0	Asymptomatic	No	n/a
31	20.3	37.04	[21-30]	M				0	Asymptomatic	Yes	[2h - 12h]
32	19.69	37.16	[21-30]	M			X	1	Symptomatic	Yes	> 24h
33	18.3	ND	[51-60]	M	X			1	Symptomatic	No	n/a
34	38.9	ND	[41-50]	M				0	Asymptomatic	Yes	[2h - 12h]
35	18.64	36.2	[21-30]	M	X	X	X	3	Symptomatic	Yes	> 24h
36	21.1	38.52	[21-30]	M			X	1	Symptomatic	Yes	[2h - 12h]
37	25.91	37.82	[61-70]	M	X		X	2	Symptomatic	No	n/a
38	22.58	32.98	[41-50]	F			X	1	Symptomatic	Yes	[0h - 1h]
39	25.03	38.84	[71-80]	F	X	X	X	3	Symptomatic	Yes	> 24h
40	16.97	34.38	[31-40]	M	X	X		2	Symptomatic	No	n/a
41	17.38	37.43	[51-60]	F	X			1	Symptomatic	No	n/a
42	22.16	35.42	[41-50]	F	X	X	X	3	Symptomatic	No	n/a
43	28.37	40.77	[21-30]	F	X		X	2	Symptomatic	No	n/a
44	19.99	ND	[21-30]	M		X		1	Symptomatic	No	n/a
45	18.45	36.36	[31-40]	M	X			1	Symptomatic	Yes	> 24h
46	20.79	ND	[41-50]	F				0	Asymptomatic	Yes	> 24h
47	38.35	ND	[10-20]	F				0	Asymptomatic	No	n/a
48	ND	37.71	[21-30]	M				0	Asymptomatic	No	n/a
49	18.96	36.58	[41-50]	M				0	Asymptomatic	Yes	[2h - 12h]
50	17.47	33.27	[31-40]	M		X		1	Symptomatic	Yes	> 24h
51	20.52	40.07	[51-60]	F				0	Asymptomatic	No	n/a
52	21.2	38.73	[31-40]	M	X	X	X	3	Symptomatic	No	n/a
53	20.22	36.11	[31-40]	F	X	X	X	3	Symptomatic	Yes	[2h - 12h]
54	17.82	37.47	[31-40]	M	X	X		2	Symptomatic	Yes	[2h - 12h]
55	11.73	30.92	[31-40]	M		X		1	Symptomatic	Yes	[2h - 12h]
56	26.03	34.04	[41-50]	F		X	X	2	Symptomatic	No	n/a
57	21.54	ND	[31-40]	M	X		X	2	Symptomatic	Yes	> 24h
58	23.84	ND	[21-30]	F	X	X		2	Symptomatic	No	n/a
59	20.57	38.14	[31-40]	F		X		1	Symptomatic	No	n/a
60	23.1	ND	[51-60]	M	X	X	X	3	Symptomatic	Yes	> 24h
61	27.74	37.71	[31-40]	M	X	X	X	3	Symptomatic	No	n/a
62	31.79	ND	[21-30]	M		X	X	2	Symptomatic	No	n/a
63	25.13	33.54	[10-20]	F	X	X	X	3	Symptomatic	Yes	> 24h
64	11.52	31.32	[31-40]	F	X	X		2	Symptomatic	Yes	> 24h
65	33.41	ND	[31-40]	M				0	Asymptomatic	Yes	[2h - 12h]
66	21.63	ND	[31-40]	M				0	Asymptomatic	No	n/a
67	24.53	ND	[41-50]	M				0	Asymptomatic	No	n/a
68	17.17	33.7	[31-40]	F				0	Asymptomatic	Yes	> 24h
69	19.88	34.13	[21-30]	M			X	1	Symptomatic	No	n/a
70	22.5	36.33	[21-30]	F			X	1	Symptomatic	Yes	[0h - 1h]
71	23.98	38.91	[41-50]	F		X	X	2	Symptomatic	No	n/a
72	21.09	35.52	[41-50]	M				0	Asymptomatic	Yes	[0h - 1h]
73	11.91	38.11	[41-50]	F				0	Asymptomatic	Yes	> 24h
74	17.24	31.36	[21-30]	M		X		1	Symptomatic	No	n/a
75	27.87	ND	[41-50]	M				0	Asymptomatic	No	n/a
76	35.51	ND	[21-30]	F		X	X	2	Symptomatic	No	n/a
77	17.7	ND	[51-60]	F		X		1	Symptomatic	No	n/a
78	29.14	36.71	[10-20]	M			X	1	Symptomatic	Yes	[2h - 12h]
79	ND	30.22	[31-40]	M		X	X	2	Symptomatic	No	n/a
80	ND	38.46	[41-50]	M				0	Asymptomatic	No	n/a
81	17.87	31.49	[31-40]	F				0	Asymptomatic	Yes	[2h - 12h]
82	20.28	39.01	[31-40]	M				0	Asymptomatic	No	n/a
83	19.96	28.01	[21-30]	M		X	X	2	Symptomatic	No	n/a
84	ND	37.4	[61-70]	M				0	Asymptomatic	Yes	> 24h
85	24.78	36.14	[31-40]	M		X		1	Symptomatic	No	n/a
86	ND	38.52	[21-30]	M				0	Asymptomatic	No	n/a
87	ND	38.88	[21-30]	F				0	Asymptomatic	No	n/a
88	ND	41.15	[51-60]	M				0	Asymptomatic	Yes	> 24h
89	19.63	31.98	[41-50]	F				0	Asymptomatic	No	n/a
90	25.29	ND	[31-40]	F	X		X	2	Symptomatic	Yes	[2h - 12h]
91	ND	39.17	[21-30]	M				0	Asymptomatic	Yes	[2h - 12h]
92	15.44	29.5	[10-20]	M	X	X		2	Symptomatic	No	n/a
93	21.51	ND	[31-40]	F				0	Asymptomatic	Yes	[2h - 12h]
94	37.81	36.87	[21-30]	M				0	Asymptomatic	Yes	[2h - 12h]
95	19.06	30.47	[10-20]	F	X	X		2	Symptomatic	No	n/a
96	24.69	ND	[21-30]	M				0	Asymptomatic	Yes	[2h - 12h]
97	18.07	36.13	[41-50]	F				0	Asymptomatic	No	n/a
98	19.95	39.69	[71-80]	M				0	Asymptomatic	No	n/a
99	30.05	ND	[41-50]	F	X	X		2	Symptomatic	No	n/a
100	21.62	ND	[31-40]	F				0	Asymptomatic	No	n/a
101	19.16	ND	[21-30]	M		X	X	2	Symptomatic	Yes	[2h - 12h]
102	29.48	38.62	[21-30]	F				0	Asymptomatic	No	n/a
103	ND	37.65	[21-30]	F				0	Asymptomatic	No	n/a
104	25.42	38.43	[51-60]	M				0	Asymptomatic	No	n/a
105	13.35	32.3	[31-40]	F				0	Asymptomatic	No	n/a
106	34.99	ND	[41-50]	M				0	Asymptomatic	Yes	[2h - 12h]
107	16.79	39.01	[41-50]	M	X			1	Symptomatic	Yes	> 24h
108	19.06	ND	[41-50]	M	X	X	X	3	Symptomatic	Yes	> 24h
109	19.63	37.1	[21-30]	M				0	Asymptomatic	Yes	> 24h
110	17.05	35.31	[51-60]	F			X	1	Symptomatic	No	n/a
111	13.13	38.49	[21-30]	M		X	X	2	Symptomatic	No	n/a
112	ND	37	[31-40]	F		X	X	2	Symptomatic	Yes	> 24h
113	15.57	36.02	[31-40]	M	X		X	2	Symptomatic	No	n/a
114	22.88	34.86	[31-40]	F	X		X	2	Symptomatic	Yes	[2h - 12h]
115	17.39	35.52	[10-20]	F	X			1	Symptomatic	No	n/a
116	18.22	31.59	[21-30]	F	X	X	X	3	Symptomatic	No	n/a
117	18.56	38.88	[21-30]	M	X		X	2	Symptomatic	No	n/a
118	25.62	38.58	[41-50]	M			X	1	Symptomatic	No	n/a
119	35.27	ND	[41-50]	F	X		X	2	Symptomatic	Yes	[2h - 12h]
120	21.65	38.57	[61-70]	M				0	Asymptomatic	Yes	[0h - 1h]
121	18.34	37.6	[21-30]	F			X	1	Symptomatic	No	n/a
122	12.55	36.04	[21-30]	F				0	Asymptomatic	Yes	[0h - 1h]
123	23.85	38.62	[21-30]	M			X	1	Symptomatic	No	n/a
124	19.26	39.21	[31-40]	M				0	Asymptomatic	No	n/a
125	28.52	39.4	[41-50]	M	X	X		2	Symptomatic	No	n/a
126	18.78	39.84	[10-20]	M				0	Asymptomatic	No	n/a
127	23.69	34.49	[41-50]	M	X	X	X	3	Symptomatic	Yes	[0h - 1h]
128	29.08	ND	[31-40]	M				0	Asymptomatic	Yes	[2h - 12h]
129	25.57	34.14	[51-60]	F		X		1	Symptomatic	No	n/a
130	25.04	38	[21-30]	F		X	X	2	Symptomatic	No	n/a
131	20.87	26.3	[41-50]	M		X	X	2	Symptomatic	Yes	[0h - 1h]
132	22.6	33.9	[51-60]	M				0	Asymptomatic	No	n/a
133	13.32	34.98	[51-60]	F		X		1	Symptomatic	No	n/a
134	21.54	ND	[31-40]	M		X		1	Symptomatic	No	n/a
135	ND	26.44	[51-60]	F		X		1	Symptomatic	No	n/a
136	15.72	36.66	[41-50]	F		X		1	Symptomatic	No	n/a
137	29.34	ND	[41-50]	F				0	Asymptomatic	NA	NA
138	37.98	ND	[41-50]	F				0	Asymptomatic	Yes	> 24h
139	34.43	37.25	[61-70]	F	X	X		2	Symptomatic	NA	NA
140	17.97	33.49	[31-40]	M				0	Asymptomatic	No	n/a
141	22.41	32.49	[51-60]	F	X	X	X	3	Symptomatic	No	n/a
142	18.53	34.66	[51-60]	M	X	X	X	3	Symptomatic	No	n/a
143	21.21	32.06	[10-20]	F	X	X	X	3	Symptomatic	No	n/a
144	24.33	ND	[31-40]	F		X	X	2	Symptomatic	No	n/a
145	15.93	ND	[10-20]	F				0	Asymptomatic	Yes	> 24h
146	32.24	35.25	[71-80]	F		X		1	Symptomatic	No	n/a
147	18.5	ND	[41-50]	F				0	Asymptomatic	No	n/a
148	19.05	30.58	[10-20]	F				0	Asymptomatic	No	n/a
149	34.17	ND	[21-30]	F	X	X		2	Symptomatic	No	n/a
150	34.17	ND	[21-30]	M				0	Asymptomatic	No	n/a
151	18.77	ND	[21-30]	F		X		1	Symptomatic	No	n/a
152	34.62	39.63	[21-30]	M				0	Asymptomatic	No	n/a
153	ND	38.19	[21-30]	F				0	Asymptomatic	No	n/a
154	16.02	ND	[41-50]	M	X	X		2	Symptomatic	Yes	[2h - 12h]
155	34.42	ND	[31-40]	M				0	Asymptomatic	No	n/a
156	15.42	ND	[31-40]	F	X	X		2	Symptomatic	Yes	[2h - 12h]
157	18.91	33.9	[31-40]	M	X	X		2	Symptomatic	No	n/a
158	17.4	ND	[21-30]	M	X	X		2	Symptomatic	No	n/a
159	19.57	39.05	[41-50]	F				0	Asymptomatic	Yes	[2h - 12h]
160	35.86	ND	[21-30]	M	X		X	2	Symptomatic	Yes	[13h - 24h]
161	29.74	ND	[31-40]	F				0	Asymptomatic	No	n/a
162	20.83	30.41	[31-40]	M			X	1	Symptomatic	No	n/a
163	23.68	34.26	[51-60]	M				0	Asymptomatic	Yes	[2h - 12h]
164	24.67	37.21	[41-50]	F				0	Asymptomatic	No	n/a
165	24.04	38.42	[51-60]	M	X		X	2	Symptomatic	No	n/a
166	25.4	ND	[41-50]	M	X	X		2	Symptomatic	No	n/a
167	17.72	35.86	[31-40]	M		X		1	Symptomatic	No	n/a
168	18.49	34.34	[51-60]	F				0	Asymptomatic	No	n/a
169	22.88	34.93	[41-50]	F				0	Asymptomatic	Yes	[13h - 24h]
170	19.16	37.55	[31-40]	M	X	X		2	Symptomatic	Yes	[2h - 12h]
171	18.47	36.71	[21-30]	F		X		1	Symptomatic	No	n/a
172	23.22	37.06	[21-30]	M	X	X		2	Symptomatic	Yes	[13h - 24h]
173	34.31	ND	[10-20]	F		X	X	2	Symptomatic	No	n/a
174	ND	38.39	[21-30]	M				0	Asymptomatic	No	n/a
175	21.89	35.54	[31-40]	F	X	X		2	Symptomatic	No	n/a
176	30.13	36.19	[41-50]	M		X		1	Symptomatic	No	n/a
177	25.43	ND	[21-30]	M	X			1	Symptomatic	No	n/a
178	17.07	28.24	[51-60]	F				0	Asymptomatic	Yes	[2h - 12h]
179	36.4	33.33	[51-60]	M				0	Asymptomatic	No	n/a
180	19.23	38.76	[51-60]	M	X	X		2	Symptomatic	Yes	[13h - 24h]
181	35.27	35.24	[10-20]	M		X	X	2	Symptomatic	No	n/a
182	17.42	36.14	[31-40]	M	X			1	Symptomatic	No	n/a
183	21.44	31.29	[10-20]	M	X			1	Symptomatic	No	n/a
184	22.29	32.04	[21-30]	F				0	Asymptomatic	Yes	[0h - 1h]
185	20.43	37.29	[51-60]	M		X		1	Symptomatic	Yes	[13h - 24h]
186	28.62	ND	[31-40]	F		X	X	3	Symptomatic	Yes	[13h - 24h]
187	38.03	ND	[10-20]	F				0	Asymptomatic	Yes	[13h - 24h]
188	31.07	ND	[61-70]	M				0	Asymptomatic	No	n/a
189	22.72	ND	[31-40]	F				0	Asymptomatic	No	n/a
190	14.76	42.84	[21-30]	F				0	Asymptomatic	No	n/a
191	22.27	39.12	[41-50]	M	X	X	X	3	Symptomatic	Yes	[0h - 1h]
192	15.81	37.62	[21-30]	F		X		1	Symptomatic	Yes	[0h - 1h]
193	23.39	36	[51-60]	M				0	Asymptomatic	No	n/a
194	24.16	37.96	[31-40]	M		X		1	Symptomatic	No	n/a
195	18.44	33.69	[21-30]	M				0	Asymptomatic	No	n/a
196	17.35	36.83	[21-30]	M	X	X		2	Symptomatic	No	n/a
ND	Not determined
NA	Not available
n/a	Not applyed
Analysis of PoST sensitivity for different thresholds of nasopharyngeal Ct of validation cohort
Ct thresholds	Nº of NF-PCR	Nº of PoST	Sensitivity
[0-13[	5	5	1
[0-15[	10	10	1
[0-17[	25	22	0.88
[0-19[	62	51	0.822581
[0-21[	89	73	0.820225
[0-23[	115	90	0.782609
[0-25[	132	101	0.765152
[0-27[	144	110	0.763889
[0-29[	150	113	0.753333
[0-31[	157	116	0.738854
[0-33[	161	117	0.726708
[0-35[	170	119	0.7
[0-37[	176	121	0.6875
[0-39[	182	122	0.67033
Two-by-two tables for sensitivity and specificity of PoST method compared to nasopharyngeal RT-PCR
	NF-PCR	PoST	Acc %	NF-PCR + / PoST -				NF - PCR
0-20	80	65	0.8125	15				(+)	(-)
20-30	75	50	0.741935	25		PoST	(+)	122	14	136
30-40	27	7	0.67033	20			(-)	60	568	628
False Post+		14						182	582	764
	182	136								*764, Total of individuals sampled on April 2021
Specificity	0.975945
Sensitivity	0.8125	When viral loads are high (Ct≤ 20)
