# Supplementary material for: Smartphone screen testing, a novel pre-diagnostic method to identify SARS-CoV-2 infectious individuals
Source: eLife journal article supplement (doi:10.7554/elife.70333), 2021-06-22
Supplement: supp [file elife-70333-supp-v1.zip › elife_poa_e70333_Source_data_3.xlsx]

## Sheet: Table 3 - Total Davila Clinic
Table 3 - Patients from Dávila Clinic, Chile
			n = 7569
Sample	Month	Clinical Ct	Procedency
1	March	24.39	EMERGENCY PATIENT
2	March	24.21	OUTPATIENT
3	March	27.28	EMERGENCY PATIENT
4	March	22.94	EMERGENCY PATIENT
5	March	17.58	OUTPATIENT
6	March	14.61	EMERGENCY PATIENT
7	March	29.26	OUTPATIENT
8	March	16.32	EMERGENCY PATIENT
9	March	13.11	EMERGENCY PATIENT
10	March	22.72	HOSPITALIZED PATIENT
11	March	15.94	EMERGENCY PATIENT
12	March	15.26	EMERGENCY PATIENT
13	March	27.3	EMERGENCY PATIENT
14	March	26.03	EMERGENCY PATIENT
15	March	15.37	EMERGENCY PATIENT
16	March	24.28	EMERGENCY PATIENT
17	March	25.89	OUTPATIENT
18	March	33.4	OUTPATIENT
19	March	17.44	OUTPATIENT
20	March	25.17	OUTPATIENT
21	March	21.5	OUTPATIENT
22	March	18.04	OUTPATIENT
23	March	25.87	OUTPATIENT
24	March	19.15	OUTPATIENT
25	March	20.17	EMERGENCY PATIENT
26	March	30.78	OUTPATIENT
27	March	24.3	OUTPATIENT
28	March	14.98	OUTPATIENT
29	March	32.89	OUTPATIENT
30	March	22.49	EMERGENCY PATIENT
31	March	28.98	EMERGENCY PATIENT
32	March	31.41	OUTPATIENT
33	March	27.44	EMERGENCY PATIENT
34	April	20.75	OUTPATIENT
35	April	27.52	OUTPATIENT
36	April	29.37	OUTPATIENT
37	April	30.78	EMERGENCY PATIENT
38	April	21.81	OUTPATIENT
39	April	21.71	OUTPATIENT
40	April	30.4	OUTPATIENT
41	April	23.68	EMERGENCY PATIENT
42	April	17.97	OUTPATIENT
43	April	26.32	OUTPATIENT
44	April	24.23	OUTPATIENT
45	April	29.85	OUTPATIENT
46	April	30.95	OUTPATIENT
47	April	31.22	EMERGENCY PATIENT
48	April	29.48	HOSPITALIZED PATIENT
49	April	36.31	HOSPITALIZED PATIENT
50	April	32.47	HOSPITALIZED PATIENT
51	April	35.11	OUTPATIENT
52	April	35.73	OUTPATIENT
53	April	32.82	EMERGENCY PATIENT
54	April	33.18	OUTPATIENT
55	April	22.94	OUTPATIENT
56	April	31.25	OUTPATIENT
57	April	26.72	OUTPATIENT
58	April	36.69	OUTPATIENT
59	April	34.55	EMERGENCY PATIENT
60	April	30.39	EMERGENCY PATIENT
61	April	15.26	EMERGENCY PATIENT
62	April	17.96	EMERGENCY PATIENT
63	April	24.56	OUTPATIENT
64	April	33.41	HOSPITALIZED PATIENT
65	April	27.62	OUTPATIENT
66	April	28.08	OUTPATIENT
67	April	21.68	OUTPATIENT
68	April	27.28	OUTPATIENT
69	April	19.76	EMERGENCY PATIENT
70	April	20.56	OUTPATIENT
71	April	29.45	HOSPITALIZED PATIENT
72	April	18.31	OUTPATIENT
73	April	21.77	OUTPATIENT
74	April	29.65	OUTPATIENT
75	April	34.75	OUTPATIENT
76	April	39.08	OUTPATIENT
77	April	16.14	OUTPATIENT
78	April	17.34	EMERGENCY PATIENT
79	April	25.87	OUTPATIENT
80	April	31.29	OUTPATIENT
81	April	25.42	HOSPITALIZED PATIENT
82	April	35.34	OUTPATIENT
83	April	21.25	OUTPATIENT
84	April	17.11	OUTPATIENT
85	April	18.04	OUTPATIENT
86	April	23.09	OUTPATIENT
87	April	34.93	OUTPATIENT
88	April	22.29	OUTPATIENT
89	April	18.54	OUTPATIENT
90	April	37.53	OUTPATIENT
91	April	18.83	OUTPATIENT
92	April	39.23	OUTPATIENT
93	April	16.31	OUTPATIENT
94	April	18.51	HOSPITALIZED PATIENT
95	April	28.36	HOSPITALIZED PATIENT
96	April	32.75	HOSPITALIZED PATIENT
97	April	33.33	HOSPITALIZED PATIENT
98	April	16.93	OUTPATIENT
99	April	24	OUTPATIENT
100	April	35.82	HOSPITALIZED PATIENT
101	April	27.18	EMERGENCY PATIENT
102	April	29.41	OUTPATIENT
103	April	35.06	EMERGENCY PATIENT
104	April	34.08	OUTPATIENT
105	April	15.6	OUTPATIENT
106	April	23.33	OUTPATIENT
107	April	35.94	OUTPATIENT
108	April	26.46	OUTPATIENT
109	April	25.48	EMERGENCY PATIENT
110	April	18.44	OUTPATIENT
111	April	33.94	EMERGENCY PATIENT
112	April	39.31	OUTPATIENT
113	April	22.69	OUTPATIENT
114	April	20.68	OUTPATIENT
115	April	38.77	OUTPATIENT
116	April	27.38	OUTPATIENT
117	April	26.05	EMERGENCY PATIENT
118	April	28.56	EMERGENCY PATIENT
119	April	29.6	EMERGENCY PATIENT
120	April	17.69	EMERGENCY PATIENT
121	April	39.1	OUTPATIENT
122	April	36.11	OUTPATIENT
123	April	37.6	OUTPATIENT
124	April	21.45	OUTPATIENT
125	April	22.45	OUTPATIENT
126	April	34.36	OUTPATIENT
127	April	24.46	OUTPATIENT
128	April	37.74	OUTPATIENT
129	April	35.22	OUTPATIENT
130	April	37.52	OUTPATIENT
131	April	33.66	OUTPATIENT
132	April	36.17	OUTPATIENT
133	April	33.03	OUTPATIENT
134	April	34.32	OUTPATIENT
135	April	28.45	OUTPATIENT
136	April	23.48	OUTPATIENT
137	April	34.97	OUTPATIENT
138	April	29.41	OUTPATIENT
139	April	28.45	OUTPATIENT
140	April	34.2	OUTPATIENT
141	April	37.84	OUTPATIENT
142	April	33.25	OUTPATIENT
143	April	16.33	OUTPATIENT
144	April	23.25	OUTPATIENT
145	April	17.31	OUTPATIENT
146	April	36.49	OUTPATIENT
147	April	34.49	OUTPATIENT
148	April	32.36	OUTPATIENT
149	April	35.19	OUTPATIENT
150	April	20.09	OUTPATIENT
151	April	21.46	OUTPATIENT
152	April	15.55	OUTPATIENT
153	April	38.06	OUTPATIENT
154	April	36.27	OUTPATIENT
155	April	32.96	OUTPATIENT
156	April	26.7	OUTPATIENT
157	April	30.39	OUTPATIENT
158	April	20.9	EMERGENCY PATIENT
159	April	34.61	OUTPATIENT
160	April	35.47	OUTPATIENT
161	April	22.07	OUTPATIENT
162	April	33.74	OUTPATIENT
163	April	38.89	OUTPATIENT
164	April	26.75	OUTPATIENT
165	April	21.5	OUTPATIENT
166	April	32.05	OUTPATIENT
167	April	29.03	OUTPATIENT
168	April	19.63	OUTPATIENT
169	April	38.47	HOSPITALIZED PATIENT
170	April	30.68	OUTPATIENT
171	April	17.1	OUTPATIENT
172	April	25.42	OUTPATIENT
173	April	36.5	OUTPATIENT
174	April	33.95	OUTPATIENT
175	April	35.69	EMERGENCY PATIENT
176	April	32.47	EMERGENCY PATIENT
177	April	32.02	EMERGENCY PATIENT
178	April	24.29	EMERGENCY PATIENT
179	April	25.91	HOSPITALIZED PATIENT
180	April	29.86	EMERGENCY PATIENT
181	April	22.9	OUTPATIENT
182	April	27.79	OUTPATIENT
183	April	33.15	OUTPATIENT
184	April	30.75	EMERGENCY PATIENT
185	April	32.74	EMERGENCY PATIENT
186	April	37.16	OUTPATIENT
187	April	25.29	OUTPATIENT
188	April	20.99	OUTPATIENT
189	April	22.77	OUTPATIENT
190	April	30.78	HOSPITALIZED PATIENT
191	April	30.65	OUTPATIENT
192	April	23.02	OUTPATIENT
193	April	23.64	EMERGENCY PATIENT
194	April	39.19	EMERGENCY PATIENT
195	April	21.63	EMERGENCY PATIENT
196	April	17.42	OUTPATIENT
197	April	19.76	OUTPATIENT
198	April	17.66	EMERGENCY PATIENT
199	April	16.28	OUTPATIENT
200	April	19.68	OUTPATIENT
201	April	33.56	EMERGENCY PATIENT
202	April	37.97	OUTPATIENT
203	April	39.41	HOSPITALIZED PATIENT
204	April	15.73	OUTPATIENT
205	April	18.01	EMERGENCY PATIENT
206	April	36.16	HOSPITALIZED PATIENT
207	April	36	EMERGENCY PATIENT
208	April	13.45	EMERGENCY PATIENT
209	April	20.11	EMERGENCY PATIENT
210	April	23.96	EMERGENCY PATIENT
211	April	30.79	HOSPITALIZED PATIENT
212	April	24.02	EMERGENCY PATIENT
213	April	26.94	EMERGENCY PATIENT
214	April	14.17	EMERGENCY PATIENT
215	April	16.17	EMERGENCY PATIENT
216	April	16.06	EMERGENCY PATIENT
217	April	19.19	EMERGENCY PATIENT
218	April	20.89	EMERGENCY PATIENT
219	April	27.67	EMERGENCY PATIENT
220	April	17.12	EMERGENCY PATIENT
221	April	23.24	EMERGENCY PATIENT
222	April	29.69	EMERGENCY PATIENT
223	April	15.47	EMERGENCY PATIENT
224	April	25.05	EMERGENCY PATIENT
225	April	19.8	EMERGENCY PATIENT
226	April	23.68	EMERGENCY PATIENT
227	April	18.74	EMERGENCY PATIENT
228	April	38.96	HOSPITALIZED PATIENT
229	April	17.22	EMERGENCY PATIENT
230	April	27.62	HOSPITALIZED PATIENT
231	April	25.15	OUTPATIENT
232	April	13.02	OUTPATIENT
233	April	16.95	OUTPATIENT
234	April	24.3	OUTPATIENT
235	April	18.92	OUTPATIENT
236	April	19.81	OUTPATIENT
237	April	22.27	OUTPATIENT
238	April	30.64	OUTPATIENT
239	April	30.57	OUTPATIENT
240	April	26.14	OUTPATIENT
241	April	19.02	OUTPATIENT
242	April	25.52	OUTPATIENT
243	April	24.73	EMERGENCY PATIENT
244	April	18.64	OUTPATIENT
245	April	29.02	OUTPATIENT
246	April	35.47	OUTPATIENT
247	April	33.53	OUTPATIENT
248	April	18.92	OUTPATIENT
249	April	21.8	OUTPATIENT
250	April	19.47	OUTPATIENT
251	April	19.78	OUTPATIENT
252	April	21.96	OUTPATIENT
253	April	16.13	EMERGENCY PATIENT
254	April	30.42	OUTPATIENT
255	April	19.4	OUTPATIENT
256	April	34.5	OUTPATIENT
257	April	19.79	EMERGENCY PATIENT
258	April	19.46	OUTPATIENT
259	April	20.53	OUTPATIENT
260	April	18.48	OUTPATIENT
261	April	28.83	OUTPATIENT
262	April	18.86	OUTPATIENT
263	April	27.16	OUTPATIENT
264	April	25.89	OUTPATIENT
265	April	35.4	OUTPATIENT
266	April	29.61	HOSPITALIZED PATIENT
267	April	16.74	OUTPATIENT
268	April	16.98	OUTPATIENT
269	April	29.53	EMERGENCY PATIENT
270	April	31.07	HOSPITALIZED PATIENT
271	April	16.49	EMERGENCY PATIENT
272	April	16.32	OUTPATIENT
273	April	23.98	OUTPATIENT
274	April	17	OUTPATIENT
275	April	34.05	EMERGENCY PATIENT
276	April	18.07	OUTPATIENT
277	April	21.58	OUTPATIENT
278	April	24.31	OUTPATIENT
279	April	20.4	OUTPATIENT
280	April	18.04	OUTPATIENT
281	April	19.43	OUTPATIENT
282	April	21.71	OUTPATIENT
283	April	21.21	OUTPATIENT
284	April	21.13	OUTPATIENT
285	April	22.71	OUTPATIENT
286	April	19.27	EMERGENCY PATIENT
287	April	16.99	EMERGENCY PATIENT
288	April	21.8	OUTPATIENT
289	April	21.4	OUTPATIENT
290	April	37.09	OUTPATIENT
291	April	20.82	OUTPATIENT
292	April	26.73	OUTPATIENT
293	April	22.39	EMERGENCY PATIENT
294	April	20.47	OUTPATIENT
295	April	23.26	OUTPATIENT
296	April	22.66	OUTPATIENT
297	April	33.39	OUTPATIENT
298	April	31.24	OUTPATIENT
299	April	16.53	OUTPATIENT
300	April	17.67	OUTPATIENT
301	April	27.02	OUTPATIENT
302	April	20.2	EMERGENCY PATIENT
303	April	23.68	OUTPATIENT
304	April	16.64	OUTPATIENT
305	April	17.66	OUTPATIENT
306	April	26.84	OUTPATIENT
307	April	18.39	OUTPATIENT
308	April	30.07	OUTPATIENT
309	April	25.42	OUTPATIENT
310	April	34.65	OUTPATIENT
311	April	17.44	OUTPATIENT
312	April	18.26	EMERGENCY PATIENT
313	April	28.88	EMERGENCY PATIENT
314	April	37.55	OUTPATIENT
315	April	34.06	OUTPATIENT
316	April	38.34	OUTPATIENT
317	April	18.82	EMERGENCY PATIENT
318	April	25.74	HOSPITALIZED PATIENT
319	April	36.35	OUTPATIENT
320	April	31.16	OUTPATIENT
321	April	20	OUTPATIENT
322	April	21.63	OUTPATIENT
323	April	22.9	OUTPATIENT
324	April	31.48	OUTPATIENT
325	April	35.95	OUTPATIENT
326	April	15.98	OUTPATIENT
327	April	17.44	OUTPATIENT
328	April	21.34	OUTPATIENT
329	April	18.53	OUTPATIENT
330	April	23.09	OUTPATIENT
331	April	33.14	OUTPATIENT
332	April	22.51	EMERGENCY PATIENT
333	April	17.5	EMERGENCY PATIENT
334	April	15.43	EMERGENCY PATIENT
335	April	24.06	EMERGENCY PATIENT
336	April	21.57	EMERGENCY PATIENT
337	April	18.3	OUTPATIENT
338	April	19.27	OUTPATIENT
339	April	16.4	OUTPATIENT
340	April	22.29	OUTPATIENT
341	April	33.56	OUTPATIENT
342	April	23.53	OUTPATIENT
343	April	23.03	OUTPATIENT
344	April	22.28	OUTPATIENT
345	April	20.01	OUTPATIENT
346	April	18.15	OUTPATIENT
347	April	18.08	EMERGENCY PATIENT
348	April	18.68	EMERGENCY PATIENT
349	April	17.66	OUTPATIENT
350	April	17.5	OUTPATIENT
351	April	27.1	OUTPATIENT
352	April	20.45	OUTPATIENT
353	April	15.35	OUTPATIENT
354	April	21.18	EMERGENCY PATIENT
355	April	30.88	OUTPATIENT
356	April	25.66	OUTPATIENT
357	April	20.76	OUTPATIENT
358	April	15.9	OUTPATIENT
359	April	15.13	EMERGENCY PATIENT
360	April	17.92	OUTPATIENT
361	April	21.72	OUTPATIENT
362	April	31.22	OUTPATIENT
363	April	22.31	OUTPATIENT
364	April	25.25	EMERGENCY PATIENT
365	April	28.04	OUTPATIENT
366	April	30.54	OUTPATIENT
367	April	24.15	OUTPATIENT
368	April	23.13	OUTPATIENT
369	April	18.46	OUTPATIENT
370	April	25.98	OUTPATIENT
371	April	14.3	OUTPATIENT
372	April	29.82	EMERGENCY PATIENT
373	April	18.66	EMERGENCY PATIENT
374	April	22.89	EMERGENCY PATIENT
375	April	39.11	EMERGENCY PATIENT
376	April	39.64	EMERGENCY PATIENT
377	April	18.07	EMERGENCY PATIENT
378	April	20.47	EMERGENCY PATIENT
379	April	18.6	EMERGENCY PATIENT
380	April	19.61	EMERGENCY PATIENT
381	April	26.27	EMERGENCY PATIENT
382	April	17.52	EMERGENCY PATIENT
383	April	20.76	EMERGENCY PATIENT
384	April	20.46	HOSPITALIZED PATIENT
385	April	20.05	EMERGENCY PATIENT
386	April	30.58	EMERGENCY PATIENT
387	April	20.78	EMERGENCY PATIENT
388	April	36.37	EMERGENCY PATIENT
389	April	34.79	EMERGENCY PATIENT
390	April	16.67	EMERGENCY PATIENT
391	April	37.22	EMERGENCY PATIENT
392	April	28.71	HOSPITALIZED PATIENT
393	April	26.31	EMERGENCY PATIENT
394	April	29.41	EMERGENCY PATIENT
395	April	16.65	EMERGENCY PATIENT
396	April	22	EMERGENCY PATIENT
397	April	17.58	EMERGENCY PATIENT
398	April	23.01	EMERGENCY PATIENT
399	April	21.73	EMERGENCY PATIENT
400	April	27.74	HOSPITALIZED PATIENT
401	April	16.83	EMERGENCY PATIENT
402	April	28.75	EMERGENCY PATIENT
403	April	33.93	EMERGENCY PATIENT
404	April	18.35	HOSPITALIZED PATIENT
405	April	27.63	EMERGENCY PATIENT
406	April	38.34	OUTPATIENT
407	April	21.89	OUTPATIENT
408	April	36.22	OUTPATIENT
409	April	26.33	OUTPATIENT
410	April	23.1	OUTPATIENT
411	April	30.72	OUTPATIENT
412	April	25.07	OUTPATIENT
413	April	19.52	HOSPITALIZED PATIENT
414	April	25.42	OUTPATIENT
415	April	25.45	OUTPATIENT
416	April	33.88	OUTPATIENT
417	April	18.79	OUTPATIENT
418	April	18.57	OUTPATIENT
419	April	18.66	OUTPATIENT
420	April	27.68	OUTPATIENT
421	April	19.94	OUTPATIENT
422	April	23.33	EMERGENCY PATIENT
423	April	25.9	OUTPATIENT
424	April	18	OUTPATIENT
425	April	18.19	OUTPATIENT
426	April	22.64	OUTPATIENT
427	April	23.59	OUTPATIENT
428	April	18.88	OUTPATIENT
429	April	25.31	OUTPATIENT
430	April	22.39	OUTPATIENT
431	April	22.93	OUTPATIENT
432	April	23.96	OUTPATIENT
433	April	17.09	EMERGENCY PATIENT
434	April	27.15	OUTPATIENT
435	April	24.12	OUTPATIENT
436	April	18.14	OUTPATIENT
437	April	16.37	OUTPATIENT
438	April	24.47	OUTPATIENT
439	April	18.28	OUTPATIENT
440	April	22.51	EMERGENCY PATIENT
441	April	15.93	OUTPATIENT
442	April	27.47	OUTPATIENT
443	April	20.29	OUTPATIENT
444	April	19.13	OUTPATIENT
445	April	29.9	OUTPATIENT
446	April	22.49	OUTPATIENT
447	April	23.11	OUTPATIENT
448	April	33.73	OUTPATIENT
449	April	11.11	OUTPATIENT
450	April	26.68	OUTPATIENT
451	April	25.02	OUTPATIENT
452	April	15.77	OUTPATIENT
453	April	21.6	OUTPATIENT
454	April	21.88	EMERGENCY PATIENT
455	April	25.85	EMERGENCY PATIENT
456	April	28.48	OUTPATIENT
457	April	19.06	EMERGENCY PATIENT
458	April	33.93	HOSPITALIZED PATIENT
459	April	19.75	OUTPATIENT
460	April	32.49	OUTPATIENT
461	April	35.6	OUTPATIENT
462	April	36.4	OUTPATIENT
463	April	20.13	OUTPATIENT
464	April	21.38	OUTPATIENT
465	April	24.07	OUTPATIENT
466	April	23.35	OUTPATIENT
467	April	36.54	OUTPATIENT
468	April	24.06	EMERGENCY PATIENT
469	April	21.47	OUTPATIENT
470	April	16.98	OUTPATIENT
471	April	20.63	OUTPATIENT
472	April	9.89	HOSPITALIZED PATIENT
473	April	14.96	OUTPATIENT
474	April	23.13	OUTPATIENT
475	April	26.83	OUTPATIENT
476	April	24.56	EMERGENCY PATIENT
477	April	17.51	OUTPATIENT
478	April	19.51	OUTPATIENT
479	April	24.46	OUTPATIENT
480	April	27.96	OUTPATIENT
481	April	14.26	OUTPATIENT
482	April	26.77	OUTPATIENT
483	April	16.75	OUTPATIENT
484	April	15.74	OUTPATIENT
485	April	14.16	OUTPATIENT
486	April	14.11	EMERGENCY PATIENT
487	April	30.07	OUTPATIENT
488	April	30.88	OUTPATIENT
489	April	18.45	OUTPATIENT
490	April	17.49	OUTPATIENT
491	April	31.17	OUTPATIENT
492	April	14.77	OUTPATIENT
493	April	14.81	OUTPATIENT
494	April	23.09	OUTPATIENT
495	April	18.68	OUTPATIENT
496	April	25.52	EMERGENCY PATIENT
497	April	34.14	EMERGENCY PATIENT
498	April	27.45	EMERGENCY PATIENT
499	April	28.69	OUTPATIENT
500	April	20.72	OUTPATIENT
501	April	32.36	OUTPATIENT
502	April	19.56	OUTPATIENT
503	April	25.99	EMERGENCY PATIENT
504	April	20.59	EMERGENCY PATIENT
505	April	9.37	OUTPATIENT
506	April	18.08	OUTPATIENT
507	April	23.41	OUTPATIENT
508	April	22.94	OUTPATIENT
509	April	14.43	OUTPATIENT
510	April	16.13	OUTPATIENT
511	April	19.33	OUTPATIENT
512	April	25.15	OUTPATIENT
513	April	28.54	OUTPATIENT
514	April	23.43	OUTPATIENT
515	April	32.69	EMERGENCY PATIENT
516	April	15.42	OUTPATIENT
517	April	20.91	OUTPATIENT
518	April	13.73	EMERGENCY PATIENT
519	April	28.48	EMERGENCY PATIENT
520	April	18.82	EMERGENCY PATIENT
521	April	20.85	EMERGENCY PATIENT
522	April	34.69	EMERGENCY PATIENT
523	April	15.36	EMERGENCY PATIENT
524	April	24.24	HOSPITALIZED PATIENT
525	April	16.3	EMERGENCY PATIENT
526	April	23.78	OUTPATIENT
527	April	20.73	OUTPATIENT
528	April	22.18	OUTPATIENT
529	April	20.36	OUTPATIENT
530	April	21.12	OUTPATIENT
531	April	16.27	OUTPATIENT
532	April	34.23	OUTPATIENT
533	April	33.75	OUTPATIENT
534	April	18.23	OUTPATIENT
535	April	35.43	OUTPATIENT
536	April	20.85	EMERGENCY PATIENT
537	April	38.06	OUTPATIENT
538	April	29.15	OUTPATIENT
539	April	24.88	OUTPATIENT
540	April	22.01	OUTPATIENT
541	April	25.13	EMERGENCY PATIENT
542	April	15.21	OUTPATIENT
543	April	34.08	EMERGENCY PATIENT
544	April	14.37	OUTPATIENT
545	April	38.68	OUTPATIENT
546	April	19.23	EMERGENCY PATIENT
547	April	15.09	OUTPATIENT
548	April	16.74	OUTPATIENT
549	April	16.47	OUTPATIENT
550	April	17.56	OUTPATIENT
551	April	19.85	OUTPATIENT
552	April	25.89	EMERGENCY PATIENT
553	April	19.72	OUTPATIENT
554	April	32.22	EMERGENCY PATIENT
555	April	15.5	OUTPATIENT
556	April	31.84	OUTPATIENT
557	April	20.86	OUTPATIENT
558	April	14.29	OUTPATIENT
559	April	13.01	OUTPATIENT
560	April	21.1	OUTPATIENT
561	April	21.63	OUTPATIENT
562	April	19.05	OUTPATIENT
563	April	21.24	OUTPATIENT
564	April	25.16	OUTPATIENT
565	April	16.69	OUTPATIENT
566	April	17.01	OUTPATIENT
567	April	34.4	OUTPATIENT
568	April	14.08	OUTPATIENT
569	April	35.37	OUTPATIENT
570	April	27.9	EMERGENCY PATIENT
571	April	28.18	EMERGENCY PATIENT
572	April	29.79	EMERGENCY PATIENT
573	April	13.76	EMERGENCY PATIENT
574	April	15.61	HOSPITALIZED PATIENT
575	April	30.66	EMERGENCY PATIENT
576	April	26.16	EMERGENCY PATIENT
577	April	25.69	HOSPITALIZED PATIENT
578	April	18.86	EMERGENCY PATIENT
579	April	32.21	EMERGENCY PATIENT
580	April	31.67	EMERGENCY PATIENT
581	April	30.58	OUTPATIENT
582	April	20.97	OUTPATIENT
583	April	14.59	OUTPATIENT
584	April	18.89	EMERGENCY PATIENT
585	April	31.78	OUTPATIENT
586	April	19.4	OUTPATIENT
587	April	18.65	OUTPATIENT
588	April	22.59	OUTPATIENT
589	April	35.55	OUTPATIENT
590	April	31.62	OUTPATIENT
591	April	18.09	OUTPATIENT
592	April	30.58	OUTPATIENT
593	April	18.12	OUTPATIENT
594	April	21.11	OUTPATIENT
595	April	18.46	OUTPATIENT
596	April	22.67	OUTPATIENT
597	April	20.17	OUTPATIENT
598	April	12.92	EMERGENCY PATIENT
599	April	22.39	EMERGENCY PATIENT
600	April	25.03	EMERGENCY PATIENT
601	April	16.05	OUTPATIENT
602	April	16.59	EMERGENCY PATIENT
603	April	17.56	EMERGENCY PATIENT
604	April	20.62	EMERGENCY PATIENT
605	April	21.32	OUTPATIENT
606	April	15.59	OUTPATIENT
607	April	29.95	EMERGENCY PATIENT
608	April	19.37	OUTPATIENT
609	April	14.76	EMERGENCY PATIENT
610	April	21.74	EMERGENCY PATIENT
611	April	23.71	EMERGENCY PATIENT
612	April	30.75	OUTPATIENT
613	April	26.01	OUTPATIENT
614	April	14.98	EMERGENCY PATIENT
615	April	10.2	EMERGENCY PATIENT
616	April	27.42	EMERGENCY PATIENT
617	April	16.12	OUTPATIENT
618	April	19.2	OUTPATIENT
619	April	15.17	OUTPATIENT
620	April	20.33	OUTPATIENT
621	April	24.8	HOSPITALIZED PATIENT
622	April	21.66	OUTPATIENT
623	April	21.35	OUTPATIENT
624	April	15.58	OUTPATIENT
625	April	14.53	OUTPATIENT
626	April	17.86	OUTPATIENT
627	April	26.61	OUTPATIENT
628	April	25.12	OUTPATIENT
629	April	15.55	OUTPATIENT
630	April	31.94	OUTPATIENT
631	April	17.74	OUTPATIENT
632	April	29.23	OUTPATIENT
633	April	32.97	EMERGENCY PATIENT
634	April	19.58	EMERGENCY PATIENT
635	April	15.9	OUTPATIENT
636	April	17.39	OUTPATIENT
637	April	22.33	OUTPATIENT
638	April	22.89	EMERGENCY PATIENT
639	April	16.84	EMERGENCY PATIENT
640	April	29.98	EMERGENCY PATIENT
641	April	15.92	EMERGENCY PATIENT
642	April	17.43	EMERGENCY PATIENT
643	April	38.06	EMERGENCY PATIENT
644	April	18.38	EMERGENCY PATIENT
645	April	20.76	EMERGENCY PATIENT
646	April	16.56	EMERGENCY PATIENT
647	April	15.62	EMERGENCY PATIENT
648	May	19.48	EMERGENCY PATIENT
649	May	17.95	EMERGENCY PATIENT
650	May	22.77	EMERGENCY PATIENT
651	May	14.97	HOSPITALIZED PATIENT
652	May	32.39	EMERGENCY PATIENT
653	May	19.55	EMERGENCY PATIENT
654	May	32.18	EMERGENCY PATIENT
655	May	28.51	EMERGENCY PATIENT
656	May	30.89	EMERGENCY PATIENT
657	May	15.95	EMERGENCY PATIENT
658	May	13.92	EMERGENCY PATIENT
659	May	18.87	EMERGENCY PATIENT
660	May	26.28	EMERGENCY PATIENT
661	May	20.55	EMERGENCY PATIENT
662	May	19.51	EMERGENCY PATIENT
663	May	24.35	EMERGENCY PATIENT
664	May	15.91	EMERGENCY PATIENT
665	May	27.26	EMERGENCY PATIENT
666	May	18.41	EMERGENCY PATIENT
667	May	16.73	EMERGENCY PATIENT
668	May	17.65	EMERGENCY PATIENT
669	May	13.46	EMERGENCY PATIENT
670	May	28.66	EMERGENCY PATIENT
671	May	23.14	EMERGENCY PATIENT
672	May	22.72	HOSPITALIZED PATIENT
673	May	14.22	EMERGENCY PATIENT
674	May	27.21	EMERGENCY PATIENT
675	May	22.62	EMERGENCY PATIENT
676	May	30.19	EMERGENCY PATIENT
677	May	37.77	HOSPITALIZED PATIENT
678	May	35.52	HOSPITALIZED PATIENT
679	May	28.88	EMERGENCY PATIENT
680	May	30.43	EMERGENCY PATIENT
681	May	32.14	EMERGENCY PATIENT
682	May	27.13	EMERGENCY PATIENT
683	May	31.92	EMERGENCY PATIENT
684	May	33.96	EMERGENCY PATIENT
685	May	25.56	EMERGENCY PATIENT
686	May	26.1	EMERGENCY PATIENT
687	May	32.82	EMERGENCY PATIENT
688	May	22.95	EMERGENCY PATIENT
689	May	23.65	EMERGENCY PATIENT
690	May	27.04	EMERGENCY PATIENT
691	May	28.12	EMERGENCY PATIENT
692	May	13.6	EMERGENCY PATIENT
693	May	38.83	EMERGENCY PATIENT
694	May	22.88	EMERGENCY PATIENT
695	May	18.12	EMERGENCY PATIENT
696	May	20.58	HOSPITALIZED PATIENT
697	May	33.82	EMERGENCY PATIENT
698	May	27.18	EMERGENCY PATIENT
699	May	23.46	EMERGENCY PATIENT
700	May	27.76	EMERGENCY PATIENT
701	May	13.96	EMERGENCY PATIENT
702	May	28.04	EMERGENCY PATIENT
703	May	18.64	EMERGENCY PATIENT
704	May	34.41	EMERGENCY PATIENT
705	May	23.27	EMERGENCY PATIENT
706	May	19.59	EMERGENCY PATIENT
707	May	18.29	EMERGENCY PATIENT
708	May	28.2	EMERGENCY PATIENT
709	May	19.4	EMERGENCY PATIENT
710	May	14.72	EMERGENCY PATIENT
711	May	25.57	EMERGENCY PATIENT
712	May	17.9	EMERGENCY PATIENT
713	May	14.45	EMERGENCY PATIENT
714	May	39.33	EMERGENCY PATIENT
715	May	39.71	HOSPITALIZED PATIENT
716	May	34.36	HOSPITALIZED PATIENT
717	May	17.3	HOSPITALIZED PATIENT
718	May	20.39	EMERGENCY PATIENT
719	May	24.86	EMERGENCY PATIENT
720	May	29.84	EMERGENCY PATIENT
721	May	25.39	EMERGENCY PATIENT
722	May	17.86	EMERGENCY PATIENT
723	May	18.98	EMERGENCY PATIENT
724	May	22.98	EMERGENCY PATIENT
725	May	15.42	EMERGENCY PATIENT
726	May	16.68	EMERGENCY PATIENT
727	May	14.35	EMERGENCY PATIENT
728	May	18.32	EMERGENCY PATIENT
729	May	29.64	EMERGENCY PATIENT
730	May	18.62	EMERGENCY PATIENT
731	May	27.76	EMERGENCY PATIENT
732	May	18.97	EMERGENCY PATIENT
733	May	21.28	EMERGENCY PATIENT
734	May	25.72	EMERGENCY PATIENT
735	May	21.37	EMERGENCY PATIENT
736	May	27.75	EMERGENCY PATIENT
737	May	22.32	EMERGENCY PATIENT
738	May	15.62	EMERGENCY PATIENT
739	May	29.9	EMERGENCY PATIENT
740	May	19.54	EMERGENCY PATIENT
741	May	37.03	HOSPITALIZED PATIENT
742	May	25.45	EMERGENCY PATIENT
743	May	14.33	EMERGENCY PATIENT
744	May	17.63	EMERGENCY PATIENT
745	May	17.81	EMERGENCY PATIENT
746	May	18.27	OUTPATIENT
747	May	20.16	EMERGENCY PATIENT
748	May	30.71	EMERGENCY PATIENT
749	May	15.43	EMERGENCY PATIENT
750	May	37.17	OUTPATIENT
751	May	14.17	EMERGENCY PATIENT
752	May	16.1	EMERGENCY PATIENT
753	May	24.25	OUTPATIENT
754	May	17.81	OUTPATIENT
755	May	32.06	OUTPATIENT
756	May	19.07	EMERGENCY PATIENT
757	May	17.54	EMERGENCY PATIENT
758	May	22.2	OUTPATIENT
759	May	35.02	OUTPATIENT
760	May	21.24	OUTPATIENT
761	May	25.9	OUTPATIENT
762	May	15.39	EMERGENCY PATIENT
763	May	18.15	OUTPATIENT
764	May	26.82	OUTPATIENT
765	May	35	OUTPATIENT
766	May	25.66	OUTPATIENT
767	May	24.9	OUTPATIENT
768	May	17.43	OUTPATIENT
769	May	28.9	EMERGENCY PATIENT
770	May	18.72	OUTPATIENT
771	May	15.84	OUTPATIENT
772	May	24.62	OUTPATIENT
773	May	18.59	OUTPATIENT
774	May	29.18	OUTPATIENT
775	May	35.51	OUTPATIENT
776	May	16.4	OUTPATIENT
777	May	19.87	EMERGENCY PATIENT
778	May	17.23	OUTPATIENT
779	May	20.73	EMERGENCY PATIENT
780	May	15.25	OUTPATIENT
781	May	35.59	EMERGENCY PATIENT
782	May	31.5	OUTPATIENT
783	May	20.14	OUTPATIENT
784	May	21.12	EMERGENCY PATIENT
785	May	16.49	OUTPATIENT
786	May	36.11	OUTPATIENT
787	May	26.54	OUTPATIENT
788	May	17.24	OUTPATIENT
789	May	19.69	OUTPATIENT
790	May	24.4	OUTPATIENT
791	May	33.66	OUTPATIENT
792	May	21.48	OUTPATIENT
793	May	15.59	OUTPATIENT
794	May	28.25	OUTPATIENT
795	May	20.67	OUTPATIENT
796	May	32.04	OUTPATIENT
797	May	27.87	OUTPATIENT
798	May	17.12	OUTPATIENT
799	May	9.32	EMERGENCY PATIENT
800	May	37.56	HOSPITALIZED PATIENT
801	May	15.59	EMERGENCY PATIENT
802	May	18.86	OUTPATIENT
803	May	14.66	OUTPATIENT
804	May	19.5	OUTPATIENT
805	May	21.99	OUTPATIENT
806	May	26.44	OUTPATIENT
807	May	30.48	OUTPATIENT
808	May	29.75	OUTPATIENT
809	May	16.7	OUTPATIENT
810	May	25.41	OUTPATIENT
811	May	22.45	OUTPATIENT
812	May	31.15	OUTPATIENT
813	May	10.6	EMERGENCY PATIENT
814	May	18.82	OUTPATIENT
815	May	14.13	EMERGENCY PATIENT
816	May	15.26	EMERGENCY PATIENT
817	May	20.22	OUTPATIENT
818	May	22.74	EMERGENCY PATIENT
819	May	16.53	EMERGENCY PATIENT
820	May	14.91	OUTPATIENT
821	May	38.58	OUTPATIENT
822	May	24.99	OUTPATIENT
823	May	18.25	OUTPATIENT
824	May	28.98	OUTPATIENT
825	May	29.08	OUTPATIENT
826	May	20.71	OUTPATIENT
827	May	20.69	OUTPATIENT
828	May	19.16	OUTPATIENT
829	May	24.02	OUTPATIENT
830	May	23.87	OUTPATIENT
831	May	20.42	OUTPATIENT
832	May	20.08	OUTPATIENT
833	May	29.44	OUTPATIENT
834	May	29.31	OUTPATIENT
835	May	34.75	OUTPATIENT
836	May	27.73	OUTPATIENT
837	May	27.97	EMERGENCY PATIENT
838	May	37.86	OUTPATIENT
839	May	35.77	OUTPATIENT
840	May	24.78	OUTPATIENT
841	May	33.88	OUTPATIENT
842	May	14.91	OUTPATIENT
843	May	19.63	OUTPATIENT
844	May	39.61	OUTPATIENT
845	May	28.68	OUTPATIENT
846	May	22.7	OUTPATIENT
847	May	22.68	EMERGENCY PATIENT
848	May	31.03	OUTPATIENT
849	May	19.37	OUTPATIENT
850	May	22.42	OUTPATIENT
851	May	28.61	EMERGENCY PATIENT
852	May	16.28	EMERGENCY PATIENT
853	May	25.14	EMERGENCY PATIENT
854	May	30.01	EMERGENCY PATIENT
855	May	14.99	EMERGENCY PATIENT
856	May	21	EMERGENCY PATIENT
857	May	26.18	EMERGENCY PATIENT
858	May	20.01	EMERGENCY PATIENT
859	May	21.85	EMERGENCY PATIENT
860	May	14.1	EMERGENCY PATIENT
861	May	26.17	EMERGENCY PATIENT
862	May	35.89	HOSPITALIZED PATIENT
863	May	29.01	EMERGENCY PATIENT
864	May	36.25	OUTPATIENT
865	May	23.32	OUTPATIENT
866	May	23.6	EMERGENCY PATIENT
867	May	32.07	OUTPATIENT
868	May	29.45	OUTPATIENT
869	May	26.55	OUTPATIENT
870	May	24.16	OUTPATIENT
871	May	17.4	OUTPATIENT
872	May	19.34	OUTPATIENT
873	May	14.28	OUTPATIENT
874	May	28.83	OUTPATIENT
875	May	17.62	OUTPATIENT
876	May	9.49	OUTPATIENT
877	May	16.05	OUTPATIENT
878	May	30.23	OUTPATIENT
879	May	27.16	OUTPATIENT
880	May	17.79	OUTPATIENT
881	May	28.75	OUTPATIENT
882	May	20.71	OUTPATIENT
883	May	31.08	OUTPATIENT
884	May	18.98	OUTPATIENT
885	May	22.63	OUTPATIENT
886	May	19.32	OUTPATIENT
887	May	15.85	OUTPATIENT
888	May	23.19	OUTPATIENT
889	May	18.42	OUTPATIENT
890	May	28.84	OUTPATIENT
891	May	19.23	OUTPATIENT
892	May	19.09	OUTPATIENT
893	May	19.23	OUTPATIENT
894	May	16.57	OUTPATIENT
895	May	15.4	OUTPATIENT
896	May	24.08	EMERGENCY PATIENT
897	May	18.81	EMERGENCY PATIENT
898	May	16.35	OUTPATIENT
899	May	18.79	OUTPATIENT
900	May	22.61	EMERGENCY PATIENT
901	May	21.72	OUTPATIENT
902	May	27.95	OUTPATIENT
903	May	14.43	EMERGENCY PATIENT
904	May	17.99	OUTPATIENT
905	May	31.88	OUTPATIENT
906	May	32.54	OUTPATIENT
907	May	35.8	OUTPATIENT
908	May	23.85	OUTPATIENT
909	May	25.48	OUTPATIENT
910	May	19.65	OUTPATIENT
911	May	28.43	OUTPATIENT
912	May	35.76	OUTPATIENT
913	May	13.18	EMERGENCY PATIENT
914	May	23.89	OUTPATIENT
915	May	36.13	OUTPATIENT
916	May	16.04	OUTPATIENT
917	May	14.51	OUTPATIENT
918	May	33.14	EMERGENCY PATIENT
919	May	38.69	OUTPATIENT
920	May	14.31	OUTPATIENT
921	May	19.64	OUTPATIENT
922	May	20.64	OUTPATIENT
923	May	18.96	OUTPATIENT
924	May	15.08	OUTPATIENT
925	May	29.65	EMERGENCY PATIENT
926	May	37.19	OUTPATIENT
927	May	38.86	OUTPATIENT
928	May	31.63	EMERGENCY PATIENT
929	May	27.56	OUTPATIENT
930	May	37.77	EMERGENCY PATIENT
931	May	27.17	EMERGENCY PATIENT
932	May	14.22	OUTPATIENT
933	May	30.69	OUTPATIENT
934	May	22.86	OUTPATIENT
935	May	34	OUTPATIENT
936	May	16.86	EMERGENCY PATIENT
937	May	19.61	OUTPATIENT
938	May	26.88	OUTPATIENT
939	May	36.66	OUTPATIENT
940	May	28.66	OUTPATIENT
941	May	28.61	OUTPATIENT
942	May	28.77	OUTPATIENT
943	May	16.92	OUTPATIENT
944	May	17.71	OUTPATIENT
945	May	27.1	OUTPATIENT
946	May	31.43	EMERGENCY PATIENT
947	May	17.65	EMERGENCY PATIENT
948	May	19.65	EMERGENCY PATIENT
949	May	17.52	EMERGENCY PATIENT
950	May	17.12	EMERGENCY PATIENT
951	May	14.13	EMERGENCY PATIENT
952	May	23	EMERGENCY PATIENT
953	May	20.66	EMERGENCY PATIENT
954	May	22.61	EMERGENCY PATIENT
955	May	20.5	EMERGENCY PATIENT
956	May	17.9	EMERGENCY PATIENT
957	May	30.69	HOSPITALIZED PATIENT
958	May	15.49	OUTPATIENT
959	May	24.71	EMERGENCY PATIENT
960	May	14.28	EMERGENCY PATIENT
961	May	36.02	EMERGENCY PATIENT
962	May	37.03	HOSPITALIZED PATIENT
963	May	23.67	OUTPATIENT
964	May	26.39	OUTPATIENT
965	May	17.26	OUTPATIENT
966	May	18.83	OUTPATIENT
967	May	16.19	OUTPATIENT
968	May	22.34	OUTPATIENT
969	May	31.49	OUTPATIENT
970	May	25.43	OUTPATIENT
971	May	27.59	HOSPITALIZED PATIENT
972	May	32.36	OUTPATIENT
973	May	22.59	HOSPITALIZED PATIENT
974	May	18.78	OUTPATIENT
975	May	34.59	OUTPATIENT
976	May	24.87	OUTPATIENT
977	May	33.13	OUTPATIENT
978	May	31.16	OUTPATIENT
979	May	21.52	OUTPATIENT
980	May	36.46	OUTPATIENT
981	May	16.18	OUTPATIENT
982	May	18.93	OUTPATIENT
983	May	18.39	OUTPATIENT
984	May	36.2	OUTPATIENT
985	May	24.66	HOSPITALIZED PATIENT
986	May	29.45	OUTPATIENT
987	May	22.93	OUTPATIENT
988	May	17.48	EMERGENCY PATIENT
989	May	32.26	OUTPATIENT
990	May	14.09	OUTPATIENT
991	May	18.68	OUTPATIENT
992	May	17.21	EMERGENCY PATIENT
993	May	27.51	OUTPATIENT
994	May	31.5	EMERGENCY PATIENT
995	May	13.16	EMERGENCY PATIENT
996	May	14.75	OUTPATIENT
997	May	27.83	EMERGENCY PATIENT
998	May	17.61	OUTPATIENT
999	May	18.22	OUTPATIENT
1000	May	19.37	OUTPATIENT
1001	May	18.62	OUTPATIENT
1002	May	21.09	OUTPATIENT
1003	May	13.95	OUTPATIENT
1004	May	20.81	EMERGENCY PATIENT
1005	May	21.48	OUTPATIENT
1006	May	22.91	EMERGENCY PATIENT
1007	May	17.1	OUTPATIENT
1008	May	15.81	OUTPATIENT
1009	May	24.25	OUTPATIENT
1010	May	16.65	OUTPATIENT
1011	May	26.07	EMERGENCY PATIENT
1012	May	19.32	OUTPATIENT
1013	May	32.62	OUTPATIENT
1014	May	14.77	OUTPATIENT
1015	May	37.76	OUTPATIENT
1016	May	23.46	EMERGENCY PATIENT
1017	May	18.03	EMERGENCY PATIENT
1018	May	19.66	EMERGENCY PATIENT
1019	May	17.99	OUTPATIENT
1020	May	32.61	OUTPATIENT
1021	May	21.44	OUTPATIENT
1022	May	20.54	EMERGENCY PATIENT
1023	May	17.8	OUTPATIENT
1024	May	20.99	OUTPATIENT
1025	May	29.57	OUTPATIENT
1026	May	25.88	OUTPATIENT
1027	May	20.72	OUTPATIENT
1028	May	13.31	EMERGENCY PATIENT
1029	May	20.95	OUTPATIENT
1030	May	28.26	OUTPATIENT
1031	May	24.92	OUTPATIENT
1032	May	18.09	EMERGENCY PATIENT
1033	May	34.81	EMERGENCY PATIENT
1034	May	27.6	EMERGENCY PATIENT
1035	May	26.95	EMERGENCY PATIENT
1036	May	38.8	HOSPITALIZED PATIENT
1037	May	20.3	EMERGENCY PATIENT
1038	May	36.83	HOSPITALIZED PATIENT
1039	May	25.93	HOSPITALIZED PATIENT
1040	May	20.88	HOSPITALIZED PATIENT
1041	May	36.13	HOSPITALIZED PATIENT
1042	May	26.03	EMERGENCY PATIENT
1043	May	24.12	EMERGENCY PATIENT
1044	May	31.56	OUTPATIENT
1045	May	23.65	OUTPATIENT
1046	May	24.69	OUTPATIENT
1047	May	20.53	OUTPATIENT
1048	May	30.88	OUTPATIENT
1049	May	20.54	OUTPATIENT
1050	May	19.64	EMERGENCY PATIENT
1051	May	32.01	OUTPATIENT
1052	May	30.29	OUTPATIENT
1053	May	17.53	OUTPATIENT
1054	May	21.81	HOSPITALIZED PATIENT
1055	May	16.02	OUTPATIENT
1056	May	21.31	OUTPATIENT
1057	May	28.25	EMERGENCY PATIENT
1058	May	16.09	OUTPATIENT
1059	May	16.35	EMERGENCY PATIENT
1060	May	24.64	OUTPATIENT
1061	May	22.94	EMERGENCY PATIENT
1062	May	19.2	OUTPATIENT
1063	May	30.42	OUTPATIENT
1064	May	22.23	OUTPATIENT
1065	May	16.25	OUTPATIENT
1066	May	22.87	OUTPATIENT
1067	May	20.1	OUTPATIENT
1068	May	38.56	OUTPATIENT
1069	May	14.95	OUTPATIENT
1070	May	17.48	OUTPATIENT
1071	May	29.89	HOSPITALIZED PATIENT
1072	May	14.2	EMERGENCY PATIENT
1073	May	26.46	OUTPATIENT
1074	May	25.87	OUTPATIENT
1075	May	17.6	OUTPATIENT
1076	May	28.67	OUTPATIENT
1077	May	22.09	EMERGENCY PATIENT
1078	May	29.71	OUTPATIENT
1079	May	7.59	EMERGENCY PATIENT
1080	May	38.18	OUTPATIENT
1081	May	27.27	OUTPATIENT
1082	May	20.34	OUTPATIENT
1083	May	16.7	OUTPATIENT
1084	May	18.67	OUTPATIENT
1085	May	31.42	EMERGENCY PATIENT
1086	May	22.55	OUTPATIENT
1087	May	23.98	OUTPATIENT
1088	May	22.29	OUTPATIENT
1089	May	17.7	OUTPATIENT
1090	May	31.48	OUTPATIENT
1091	May	30.22	OUTPATIENT
1092	May	25.81	OUTPATIENT
1093	May	26.43	OUTPATIENT
1094	May	31.51	EMERGENCY PATIENT
1095	May	17.56	OUTPATIENT
1096	May	24.22	OUTPATIENT
1097	May	28.63	EMERGENCY PATIENT
1098	May	19.4	OUTPATIENT
1099	May	18.32	EMERGENCY PATIENT
1100	May	21.7	OUTPATIENT
1101	May	16.19	OUTPATIENT
1102	May	32.53	OUTPATIENT
1103	May	18.33	EMERGENCY PATIENT
1104	May	26.09	OUTPATIENT
1105	May	20.21	OUTPATIENT
1106	May	29.97	OUTPATIENT
1107	May	18.38	OUTPATIENT
1108	May	23.23	OUTPATIENT
1109	May	16.53	OUTPATIENT
1110	May	16.01	EMERGENCY PATIENT
1111	May	28.74	OUTPATIENT
1112	May	20.76	OUTPATIENT
1113	May	36.93	OUTPATIENT
1114	May	28.21	EMERGENCY PATIENT
1115	May	19.05	OUTPATIENT
1116	May	31.63	OUTPATIENT
1117	May	27.52	OUTPATIENT
1118	May	15.22	OUTPATIENT
1119	May	28.55	OUTPATIENT
1120	May	30.61	OUTPATIENT
1121	May	28.94	OUTPATIENT
1122	May	25.17	OUTPATIENT
1123	May	20.33	OUTPATIENT
1124	May	21.01	OUTPATIENT
1125	May	26.39	OUTPATIENT
1126	May	23.02	OUTPATIENT
1127	May	17.07	OUTPATIENT
1128	May	25.43	OUTPATIENT
1129	May	36.31	OUTPATIENT
1130	May	34.93	OUTPATIENT
1131	May	37.73	OUTPATIENT
1132	May	36.6	OUTPATIENT
1133	May	33.8	OUTPATIENT
1134	May	24.41	OUTPATIENT
1135	May	31.91	OUTPATIENT
1136	May	29.92	OUTPATIENT
1137	May	25.81	OUTPATIENT
1138	May	37.99	OUTPATIENT
1139	May	29.05	OUTPATIENT
1140	May	23.72	OUTPATIENT
1141	May	33.94	EMERGENCY PATIENT
1142	May	23.52	OUTPATIENT
1143	May	26.74	OUTPATIENT
1144	May	27.55	OUTPATIENT
1145	May	24.83	OUTPATIENT
1146	May	38.28	OUTPATIENT
1147	May	33.78	OUTPATIENT
1148	May	21.89	OUTPATIENT
1149	May	32.64	OUTPATIENT
1150	May	34.47	OUTPATIENT
1151	May	22.3	OUTPATIENT
1152	May	17.1	OUTPATIENT
1153	May	34.1	OUTPATIENT
1154	May	16.08	EMERGENCY PATIENT
1155	May	27.44	EMERGENCY PATIENT
1156	May	26.26	EMERGENCY PATIENT
1157	May	16.44	EMERGENCY PATIENT
1158	May	28.17	EMERGENCY PATIENT
1159	May	18.06	EMERGENCY PATIENT
1160	May	19.67	EMERGENCY PATIENT
1161	May	37.13	OUTPATIENT
1162	May	38.22	EMERGENCY PATIENT
1163	May	28.62	HOSPITALIZED PATIENT
1164	May	28.76	EMERGENCY PATIENT
1165	May	22	HOSPITALIZED PATIENT
1166	May	32.85	HOSPITALIZED PATIENT
1167	May	39.29	OUTPATIENT
1168	May	34.95	HOSPITALIZED PATIENT
1169	May	32.65	OUTPATIENT
1170	May	30.14	OUTPATIENT
1171	May	35.7	EMERGENCY PATIENT
1172	May	32.52	EMERGENCY PATIENT
1173	May	38.55	OUTPATIENT
1174	May	20.18	OUTPATIENT
1175	May	22.01	OUTPATIENT
1176	May	35.53	OUTPATIENT
1177	May	30.95	OUTPATIENT
1178	May	17.94	EMERGENCY PATIENT
1179	May	24.54	OUTPATIENT
1180	May	19.28	OUTPATIENT
1181	May	22.69	OUTPATIENT
1182	May	25.46	EMERGENCY PATIENT
1183	May	23.33	OUTPATIENT
1184	May	30.42	EMERGENCY PATIENT
1185	May	24.99	OUTPATIENT
1186	May	21.45	OUTPATIENT
1187	May	30.76	OUTPATIENT
1188	May	31.17	EMERGENCY PATIENT
1189	May	21.17	OUTPATIENT
1190	May	14.9	EMERGENCY PATIENT
1191	May	17.42	EMERGENCY PATIENT
1192	May	14.38	EMERGENCY PATIENT
1193	May	26.28	OUTPATIENT
1194	May	17.54	EMERGENCY PATIENT
1195	May	34.67	OUTPATIENT
1196	May	32.06	OUTPATIENT
1197	May	25.31	OUTPATIENT
1198	May	20.99	OUTPATIENT
1199	May	24.95	OUTPATIENT
1200	May	36.5	OUTPATIENT
1201	May	28.71	EMERGENCY PATIENT
1202	May	19.34	OUTPATIENT
1203	May	22.15	EMERGENCY PATIENT
1204	May	35.82	OUTPATIENT
1205	May	21.69	OUTPATIENT
1206	May	21.92	OUTPATIENT
1207	May	36.75	OUTPATIENT
1208	May	37.58	OUTPATIENT
1209	May	16.94	OUTPATIENT
1210	May	19.82	EMERGENCY PATIENT
1211	May	24.74	OUTPATIENT
1212	May	32.11	OUTPATIENT
1213	May	34.3	OUTPATIENT
1214	May	26.91	OUTPATIENT
1215	May	19.75	OUTPATIENT
1216	May	17.25	OUTPATIENT
1217	May	18.74	OUTPATIENT
1218	May	22.29	OUTPATIENT
1219	May	32.16	OUTPATIENT
1220	May	23.92	OUTPATIENT
1221	May	15.6	EMERGENCY PATIENT
1222	May	31.36	EMERGENCY PATIENT
1223	May	38.53	OUTPATIENT
1224	May	29.03	OUTPATIENT
1225	May	20.27	OUTPATIENT
1226	May	27.91	OUTPATIENT
1227	May	20.74	OUTPATIENT
1228	May	21.95	OUTPATIENT
1229	May	21.11	OUTPATIENT
1230	May	22.4	OUTPATIENT
1231	May	21.66	EMERGENCY PATIENT
1232	May	25	EMERGENCY PATIENT
1233	May	30.16	OUTPATIENT
1234	May	30.94	OUTPATIENT
1235	May	20.84	OUTPATIENT
1236	May	26.53	OUTPATIENT
1237	May	28.58	EMERGENCY PATIENT
1238	May	39.19	OUTPATIENT
1239	May	24.03	OUTPATIENT
1240	May	35.48	OUTPATIENT
1241	May	34.6	OUTPATIENT
1242	May	24.28	OUTPATIENT
1243	May	28.46	OUTPATIENT
1244	May	30.9	OUTPATIENT
1245	May	25.97	OUTPATIENT
1246	May	30.28	OUTPATIENT
1247	May	31.58	OUTPATIENT
1248	May	19.63	OUTPATIENT
1249	May	34.76	OUTPATIENT
1250	May	24.8	OUTPATIENT
1251	May	23.17	OUTPATIENT
1252	May	29.4	OUTPATIENT
1253	May	24.8	EMERGENCY PATIENT
1254	May	21.89	OUTPATIENT
1255	May	33.67	OUTPATIENT
1256	May	29.12	OUTPATIENT
1257	May	27.36	OUTPATIENT
1258	May	38.27	OUTPATIENT
1259	May	39.97	OUTPATIENT
1260	May	27.35	EMERGENCY PATIENT
1261	May	20.56	OUTPATIENT
1262	May	34.57	OUTPATIENT
1263	May	24.03	OUTPATIENT
1264	May	21.69	OUTPATIENT
1265	May	19.61	OUTPATIENT
1266	May	26.82	EMERGENCY PATIENT
1267	May	29.07	OUTPATIENT
1268	May	19.89	OUTPATIENT
1269	May	16.84	OUTPATIENT
1270	May	35.35	EMERGENCY PATIENT
1271	May	18.18	EMERGENCY PATIENT
1272	May	12.54	EMERGENCY PATIENT
1273	May	23.06	EMERGENCY PATIENT
1274	May	14.32	EMERGENCY PATIENT
1275	May	26.14	EMERGENCY PATIENT
1276	May	13.97	EMERGENCY PATIENT
1277	May	23.29	EMERGENCY PATIENT
1278	May	27.68	HOSPITALIZED PATIENT
1279	May	16.54	EMERGENCY PATIENT
1280	May	29.49	EMERGENCY PATIENT
1281	May	31.79	EMERGENCY PATIENT
1282	May	17.68	EMERGENCY PATIENT
1283	May	20.88	OUTPATIENT
1284	May	24.8	EMERGENCY PATIENT
1285	May	26.99	EMERGENCY PATIENT
1286	May	22.45	OUTPATIENT
1287	May	17.32	OUTPATIENT
1288	May	31.85	OUTPATIENT
1289	May	19.94	OUTPATIENT
1290	May	13.74	EMERGENCY PATIENT
1291	May	34.28	OUTPATIENT
1292	May	31.11	OUTPATIENT
1293	May	17.77	EMERGENCY PATIENT
1294	May	15	EMERGENCY PATIENT
1295	May	22.12	OUTPATIENT
1296	May	27.81	OUTPATIENT
1297	May	24.9	OUTPATIENT
1298	May	17.11	OUTPATIENT
1299	May	38.15	OUTPATIENT
1300	May	19.93	OUTPATIENT
1301	May	38.46	EMERGENCY PATIENT
1302	May	36.11	OUTPATIENT
1303	May	37.29	OUTPATIENT
1304	May	22.27	OUTPATIENT
1305	May	27.57	OUTPATIENT
1306	May	20.98	OUTPATIENT
1307	May	34.88	OUTPATIENT
1308	May	27.1	EMERGENCY PATIENT
1309	May	25.92	OUTPATIENT
1310	May	25.28	OUTPATIENT
1311	May	20.67	OUTPATIENT
1312	May	23.01	OUTPATIENT
1313	May	22.72	EMERGENCY PATIENT
1314	May	23.67	EMERGENCY PATIENT
1315	May	31.61	OUTPATIENT
1316	May	30.98	OUTPATIENT
1317	May	36.51	OUTPATIENT
1318	May	23.53	OUTPATIENT
1319	May	32.37	OUTPATIENT
1320	May	23.09	EMERGENCY PATIENT
1321	May	14.15	OUTPATIENT
1322	May	19.96	OUTPATIENT
1323	May	31.25	OUTPATIENT
1324	May	20.58	OUTPATIENT
1325	May	17.63	EMERGENCY PATIENT
1326	May	25.34	EMERGENCY PATIENT
1327	May	18.48	OUTPATIENT
1328	May	23.28	OUTPATIENT
1329	May	19.39	OUTPATIENT
1330	May	30.7	OUTPATIENT
1331	May	18.77	OUTPATIENT
1332	May	23.49	EMERGENCY PATIENT
1333	May	33.22	EMERGENCY PATIENT
1334	May	15.19	OUTPATIENT
1335	May	30.59	EMERGENCY PATIENT
1336	May	27.79	OUTPATIENT
1337	May	36.28	OUTPATIENT
1338	May	14.53	EMERGENCY PATIENT
1339	May	38.05	EMERGENCY PATIENT
1340	May	37.69	OUTPATIENT
1341	May	28.14	EMERGENCY PATIENT
1342	May	24.08	OUTPATIENT
1343	May	32.31	OUTPATIENT
1344	May	27.33	EMERGENCY PATIENT
1345	May	14.73	EMERGENCY PATIENT
1346	May	23.93	OUTPATIENT
1347	May	28.69	EMERGENCY PATIENT
1348	May	16.47	EMERGENCY PATIENT
1349	May	31.53	OUTPATIENT
1350	May	29.62	OUTPATIENT
1351	May	24.15	OUTPATIENT
1352	May	20.89	EMERGENCY PATIENT
1353	May	18.23	EMERGENCY PATIENT
1354	May	27.8	OUTPATIENT
1355	May	34.04	OUTPATIENT
1356	May	30.71	EMERGENCY PATIENT
1357	May	15.37	OUTPATIENT
1358	May	18.5	OUTPATIENT
1359	May	35.06	EMERGENCY PATIENT
1360	May	17.78	OUTPATIENT
1361	May	31.23	OUTPATIENT
1362	May	21.81	OUTPATIENT
1363	May	18.17	OUTPATIENT
1364	May	22.71	OUTPATIENT
1365	May	25.25	OUTPATIENT
1366	May	21.67	EMERGENCY PATIENT
1367	May	15.04	EMERGENCY PATIENT
1368	May	21.79	OUTPATIENT
1369	May	32.94	EMERGENCY PATIENT
1370	May	28.12	OUTPATIENT
1371	May	34.25	OUTPATIENT
1372	May	26.94	OUTPATIENT
1373	May	17.06	EMERGENCY PATIENT
1374	May	20.27	EMERGENCY PATIENT
1375	May	15.85	EMERGENCY PATIENT
1376	May	21.64	EMERGENCY PATIENT
1377	May	18.81	EMERGENCY PATIENT
1378	May	13.34	EMERGENCY PATIENT
1379	May	15.25	EMERGENCY PATIENT
1380	May	18.86	EMERGENCY PATIENT
1381	May	26.78	EMERGENCY PATIENT
1382	May	22.12	EMERGENCY PATIENT
1383	May	19.04	EMERGENCY PATIENT
1384	May	30.98	EMERGENCY PATIENT
1385	May	30.15	EMERGENCY PATIENT
1386	May	15.98	HOSPITALIZED PATIENT
1387	May	20.59	EMERGENCY PATIENT
1388	May	32.09	EMERGENCY PATIENT
1389	May	29.34	EMERGENCY PATIENT
1390	May	14.68	EMERGENCY PATIENT
1391	May	19.12	EMERGENCY PATIENT
1392	May	15.41	EMERGENCY PATIENT
1393	May	24.29	EMERGENCY PATIENT
1394	May	33.72	EMERGENCY PATIENT
1395	May	36.34	HOSPITALIZED PATIENT
1396	May	21.58	EMERGENCY PATIENT
1397	May	19.19	EMERGENCY PATIENT
1398	May	16.82	EMERGENCY PATIENT
1399	May	25.59	EMERGENCY PATIENT
1400	May	17.83	EMERGENCY PATIENT
1401	May	21.54	EMERGENCY PATIENT
1402	May	28.12	EMERGENCY PATIENT
1403	May	27.91	EMERGENCY PATIENT
1404	May	18.25	HOSPITALIZED PATIENT
1405	May	19.34	EMERGENCY PATIENT
1406	May	28.94	EMERGENCY PATIENT
1407	May	35.23	EMERGENCY PATIENT
1408	May	32.33	EMERGENCY PATIENT
1409	May	23.88	EMERGENCY PATIENT
1410	May	38.14	EMERGENCY PATIENT
1411	May	35.4	EMERGENCY PATIENT
1412	May	20.99	EMERGENCY PATIENT
1413	May	29.02	EMERGENCY PATIENT
1414	May	22.48	EMERGENCY PATIENT
1415	May	33.13	EMERGENCY PATIENT
1416	May	23.24	EMERGENCY PATIENT
1417	May	23.63	EMERGENCY PATIENT
1418	May	24.41	EMERGENCY PATIENT
1419	May	18.09	EMERGENCY PATIENT
1420	May	28.14	EMERGENCY PATIENT
1421	May	16.78	EMERGENCY PATIENT
1422	May	23.56	EMERGENCY PATIENT
1423	May	16.09	EMERGENCY PATIENT
1424	May	26.97	EMERGENCY PATIENT
1425	May	28.27	EMERGENCY PATIENT
1426	May	29.63	EMERGENCY PATIENT
1427	May	22.98	EMERGENCY PATIENT
1428	May	16.33	EMERGENCY PATIENT
1429	May	29	EMERGENCY PATIENT
1430	May	22.15	EMERGENCY PATIENT
1431	May	23.7	EMERGENCY PATIENT
1432	May	22.13	EMERGENCY PATIENT
1433	May	29.87	EMERGENCY PATIENT
1434	May	30.79	EMERGENCY PATIENT
1435	May	29.68	EMERGENCY PATIENT
1436	May	19.83	EMERGENCY PATIENT
1437	May	29.04	HOSPITALIZED PATIENT
1438	May	12.46	EMERGENCY PATIENT
1439	May	29.81	EMERGENCY PATIENT
1440	May	17.73	EMERGENCY PATIENT
1441	May	30.76	OUTPATIENT
1442	May	14.85	EMERGENCY PATIENT
1443	May	16.96	EMERGENCY PATIENT
1444	May	15.56	EMERGENCY PATIENT
1445	May	21.08	EMERGENCY PATIENT
1446	May	22.29	EMERGENCY PATIENT
1447	May	14.08	EMERGENCY PATIENT
1448	May	18.58	OUTPATIENT
1449	May	39.21	OUTPATIENT
1450	May	13.98	EMERGENCY PATIENT
1451	May	14.46	EMERGENCY PATIENT
1452	May	33.43	OUTPATIENT
1453	May	28.19	OUTPATIENT
1454	May	15.92	EMERGENCY PATIENT
1455	May	14.79	EMERGENCY PATIENT
1456	May	27.62	OUTPATIENT
1457	May	21.45	OUTPATIENT
1458	May	18	OUTPATIENT
1459	May	21.95	EMERGENCY PATIENT
1460	May	14.35	EMERGENCY PATIENT
1461	May	21.69	OUTPATIENT
1462	May	31.87	OUTPATIENT
1463	May	18.94	OUTPATIENT
1464	May	24.43	OUTPATIENT
1465	May	38.32	OUTPATIENT
1466	May	30.19	EMERGENCY PATIENT
1467	May	18.41	EMERGENCY PATIENT
1468	May	21	EMERGENCY PATIENT
1469	May	27.31	EMERGENCY PATIENT
1470	May	21.27	OUTPATIENT
1471	May	14.31	EMERGENCY PATIENT
1472	May	33.86	OUTPATIENT
1473	May	20.49	EMERGENCY PATIENT
1474	May	13.53	EMERGENCY PATIENT
1475	May	28.26	EMERGENCY PATIENT
1476	May	24.64	EMERGENCY PATIENT
1477	May	22.46	EMERGENCY PATIENT
1478	May	31.85	OUTPATIENT
1479	May	34.33	OUTPATIENT
1480	May	27.57	OUTPATIENT
1481	May	37.48	OUTPATIENT
1482	May	38.9	OUTPATIENT
1483	May	21.15	OUTPATIENT
1484	May	36.26	OUTPATIENT
1485	May	25.41	OUTPATIENT
1486	May	30.58	EMERGENCY PATIENT
1487	May	16.34	EMERGENCY PATIENT
1488	May	28.38	EMERGENCY PATIENT
1489	May	20.82	EMERGENCY PATIENT
1490	May	25.19	OUTPATIENT
1491	May	19.59	OUTPATIENT
1492	May	11.79	EMERGENCY PATIENT
1493	May	36.07	OUTPATIENT
1494	May	19.55	OUTPATIENT
1495	May	24.07	EMERGENCY PATIENT
1496	May	26.55	EMERGENCY PATIENT
1497	May	38.8	HOSPITALIZED PATIENT
1498	May	14.25	OUTPATIENT
1499	May	14.13	EMERGENCY PATIENT
1500	May	38.5	OUTPATIENT
1501	May	29.38	OUTPATIENT
1502	May	17.75	EMERGENCY PATIENT
1503	May	19.24	EMERGENCY PATIENT
1504	May	16.22	EMERGENCY PATIENT
1505	May	21.64	EMERGENCY PATIENT
1506	May	20.31	OUTPATIENT
1507	May	19.18	OUTPATIENT
1508	May	26.96	EMERGENCY PATIENT
1509	May	17.72	EMERGENCY PATIENT
1510	May	21.3	OUTPATIENT
1511	May	23.66	OUTPATIENT
1512	May	19.29	OUTPATIENT
1513	May	15.84	OUTPATIENT
1514	May	35.45	EMERGENCY PATIENT
1515	May	26.47	OUTPATIENT
1516	May	34.22	OUTPATIENT
1517	May	31.74	EMERGENCY PATIENT
1518	May	20.58	OUTPATIENT
1519	May	19.86	EMERGENCY PATIENT
1520	May	16.72	EMERGENCY PATIENT
1521	May	38.38	OUTPATIENT
1522	May	15.89	EMERGENCY PATIENT
1523	May	28.64	OUTPATIENT
1524	May	18.09	OUTPATIENT
1525	May	26.59	EMERGENCY PATIENT
1526	May	27.16	EMERGENCY PATIENT
1527	May	25.14	OUTPATIENT
1528	May	20.78	OUTPATIENT
1529	May	16.74	EMERGENCY PATIENT
1530	May	18.27	EMERGENCY PATIENT
1531	May	16.77	EMERGENCY PATIENT
1532	May	17.02	EMERGENCY PATIENT
1533	May	23.01	EMERGENCY PATIENT
1534	May	24.15	EMERGENCY PATIENT
1535	May	30.39	EMERGENCY PATIENT
1536	May	19.54	EMERGENCY PATIENT
1537	May	29.22	EMERGENCY PATIENT
1538	May	38.25	EMERGENCY PATIENT
1539	May	17.12	EMERGENCY PATIENT
1540	May	33.17	EMERGENCY PATIENT
1541	May	32.68	EMERGENCY PATIENT
1542	May	32.02	EMERGENCY PATIENT
1543	May	19.29	EMERGENCY PATIENT
1544	May	26.46	EMERGENCY PATIENT
1545	May	26.82	EMERGENCY PATIENT
1546	May	30.94	EMERGENCY PATIENT
1547	May	29.99	EMERGENCY PATIENT
1548	May	24.62	EMERGENCY PATIENT
1549	May	21.54	EMERGENCY PATIENT
1550	May	33.91	EMERGENCY PATIENT
1551	May	21.79	EMERGENCY PATIENT
1552	May	20.1	EMERGENCY PATIENT
1553	May	33.41	EMERGENCY PATIENT
1554	May	35.66	EMERGENCY PATIENT
1555	May	19.12	EMERGENCY PATIENT
1556	May	16.34	EMERGENCY PATIENT
1557	May	32.59	EMERGENCY PATIENT
1558	May	28.71	EMERGENCY PATIENT
1559	May	30.75	EMERGENCY PATIENT
1560	May	36.49	EMERGENCY PATIENT
1561	May	16.77	EMERGENCY PATIENT
1562	May	29.34	OUTPATIENT
1563	May	16.9	OUTPATIENT
1564	May	25.6	OUTPATIENT
1565	May	23.56	OUTPATIENT
1566	May	23.66	OUTPATIENT
1567	May	19.41	OUTPATIENT
1568	May	24.62	OUTPATIENT
1569	May	24.09	OUTPATIENT
1570	May	30.55	EMERGENCY PATIENT
1571	May	25.84	EMERGENCY PATIENT
1572	May	11.87	EMERGENCY PATIENT
1573	May	26.19	EMERGENCY PATIENT
1574	May	25.37	EMERGENCY PATIENT
1575	May	39.14	HOSPITALIZED PATIENT
1576	May	38.2	HOSPITALIZED PATIENT
1577	May	28.12	EMERGENCY PATIENT
1578	May	39.52	HOSPITALIZED PATIENT
1579	May	20.98	EMERGENCY PATIENT
1580	May	21.34	EMERGENCY PATIENT
1581	May	34.6	OUTPATIENT
1582	May	18.4	OUTPATIENT
1583	May	33.95	OUTPATIENT
1584	May	20.42	OUTPATIENT
1585	May	21.65	EMERGENCY PATIENT
1586	May	28.4	OUTPATIENT
1587	May	26.53	OUTPATIENT
1588	May	31.23	OUTPATIENT
1589	May	22.54	OUTPATIENT
1590	May	33.74	OUTPATIENT
1591	May	27.65	OUTPATIENT
1592	May	23.75	EMERGENCY PATIENT
1593	May	39.1	OUTPATIENT
1594	May	29.9	OUTPATIENT
1595	May	25.13	OUTPATIENT
1596	May	20.56	EMERGENCY PATIENT
1597	May	20.92	OUTPATIENT
1598	May	28.54	EMERGENCY PATIENT
1599	May	16.55	EMERGENCY PATIENT
1600	May	18.65	OUTPATIENT
1601	May	18.86	OUTPATIENT
1602	May	30.09	OUTPATIENT
1603	May	21.59	OUTPATIENT
1604	May	34.92	OUTPATIENT
1605	May	35.15	OUTPATIENT
1606	May	26.68	OUTPATIENT
1607	May	19.46	OUTPATIENT
1608	May	17.65	OUTPATIENT
1609	May	19.46	OUTPATIENT
1610	May	36.1	OUTPATIENT
1611	May	24.5	EMERGENCY PATIENT
1612	May	20.69	OUTPATIENT
1613	May	24.87	OUTPATIENT
1614	May	15.49	EMERGENCY PATIENT
1615	May	19.75	OUTPATIENT
1616	May	23.18	EMERGENCY PATIENT
1617	May	21.13	OUTPATIENT
1618	May	21.14	EMERGENCY PATIENT
1619	May	32.89	EMERGENCY PATIENT
1620	May	24.91	OUTPATIENT
1621	May	23.44	HOSPITALIZED PATIENT
1622	May	15.04	EMERGENCY PATIENT
1623	May	19.6	EMERGENCY PATIENT
1624	May	37.17	OUTPATIENT
1625	May	26.47	EMERGENCY PATIENT
1626	May	28.17	EMERGENCY PATIENT
1627	May	29.83	OUTPATIENT
1628	May	25.65	EMERGENCY PATIENT
1629	May	38.44	OUTPATIENT
1630	May	31.75	OUTPATIENT
1631	May	20.4	EMERGENCY PATIENT
1632	May	30.43	EMERGENCY PATIENT
1633	May	20.42	EMERGENCY PATIENT
1634	May	28.9	OUTPATIENT
1635	May	13.65	OUTPATIENT
1636	May	22.79	OUTPATIENT
1637	May	29.94	EMERGENCY PATIENT
1638	May	18.75	OUTPATIENT
1639	May	27.1	OUTPATIENT
1640	May	17.65	OUTPATIENT
1641	May	29.95	OUTPATIENT
1642	May	25.81	OUTPATIENT
1643	May	24.73	OUTPATIENT
1644	May	38.34	OUTPATIENT
1645	May	24.31	OUTPATIENT
1646	May	24.02	OUTPATIENT
1647	May	37.67	OUTPATIENT
1648	May	21.9	OUTPATIENT
1649	May	19.05	OUTPATIENT
1650	May	17.72	OUTPATIENT
1651	May	32.7	OUTPATIENT
1652	May	21.01	OUTPATIENT
1653	May	23.36	OUTPATIENT
1654	May	23.08	OUTPATIENT
1655	May	31.61	EMERGENCY PATIENT
1656	May	33.96	OUTPATIENT
1657	May	36.64	EMERGENCY PATIENT
1658	May	35.4	OUTPATIENT
1659	May	26.48	OUTPATIENT
1660	May	21.4	OUTPATIENT
1661	May	24.53	EMERGENCY PATIENT
1662	May	15.72	EMERGENCY PATIENT
1663	May	23.22	OUTPATIENT
1664	May	19.14	OUTPATIENT
1665	May	37.92	OUTPATIENT
1666	May	18.95	HOSPITALIZED PATIENT
1667	May	21.88	EMERGENCY PATIENT
1668	May	21.57	OUTPATIENT
1669	May	30.37	OUTPATIENT
1670	May	17.03	EMERGENCY PATIENT
1671	May	35.78	OUTPATIENT
1672	May	36.94	OUTPATIENT
1673	May	25.87	OUTPATIENT
1674	May	15.52	EMERGENCY PATIENT
1675	May	28.17	EMERGENCY PATIENT
1676	May	34.59	OUTPATIENT
1677	May	22.63	EMERGENCY PATIENT
1678	May	26.57	EMERGENCY PATIENT
1679	May	22.53	EMERGENCY PATIENT
1680	May	17.01	EMERGENCY PATIENT
1681	May	24.14	OUTPATIENT
1682	May	19.19	EMERGENCY PATIENT
1683	May	21.78	EMERGENCY PATIENT
1684	May	13.36	EMERGENCY PATIENT
1685	May	19.26	OUTPATIENT
1686	May	30.23	EMERGENCY PATIENT
1687	May	16.43	EMERGENCY PATIENT
1688	May	37.53	EMERGENCY PATIENT
1689	May	16.46	EMERGENCY PATIENT
1690	May	27.33	EMERGENCY PATIENT
1691	May	36.5	EMERGENCY PATIENT
1692	May	32.57	EMERGENCY PATIENT
1693	May	24.75	EMERGENCY PATIENT
1694	May	34.72	EMERGENCY PATIENT
1695	May	16.21	EMERGENCY PATIENT
1696	May	17	EMERGENCY PATIENT
1697	May	27.24	EMERGENCY PATIENT
1698	May	34.29	EMERGENCY PATIENT
1699	May	17.83	EMERGENCY PATIENT
1700	May	18.56	EMERGENCY PATIENT
1701	May	18.57	OUTPATIENT
1702	May	31.84	OUTPATIENT
1703	May	25.12	OUTPATIENT
1704	May	30.18	OUTPATIENT
1705	May	34.93	OUTPATIENT
1706	May	30.9	OUTPATIENT
1707	May	25.92	OUTPATIENT
1708	May	17.87	OUTPATIENT
1709	May	37.63	OUTPATIENT
1710	May	26.14	OUTPATIENT
1711	May	35.77	HOSPITALIZED PATIENT
1712	May	29.05	OUTPATIENT
1713	May	30.05	HOSPITALIZED PATIENT
1714	May	21.23	OUTPATIENT
1715	May	29.34	OUTPATIENT
1716	May	24.8	OUTPATIENT
1717	May	33.41	EMERGENCY PATIENT
1718	May	33.63	EMERGENCY PATIENT
1719	May	29.16	OUTPATIENT
1720	May	20.67	OUTPATIENT
1721	May	28.2	OUTPATIENT
1722	May	35.86	EMERGENCY PATIENT
1723	May	35.59	OUTPATIENT
1724	May	17.08	EMERGENCY PATIENT
1725	May	31.24	OUTPATIENT
1726	May	20.68	EMERGENCY PATIENT
1727	May	34	OUTPATIENT
1728	May	31.16	OUTPATIENT
1729	May	25.95	OUTPATIENT
1730	May	26.02	EMERGENCY PATIENT
1731	May	23.15	OUTPATIENT
1732	May	27.58	OUTPATIENT
1733	May	25.73	EMERGENCY PATIENT
1734	May	27.86	OUTPATIENT
1735	May	16.61	EMERGENCY PATIENT
1736	May	30.07	OUTPATIENT
1737	May	26.3	EMERGENCY PATIENT
1738	May	34.56	EMERGENCY PATIENT
1739	May	19.51	OUTPATIENT
1740	May	28.76	OUTPATIENT
1741	May	35.7	OUTPATIENT
1742	May	22.65	OUTPATIENT
1743	May	22.65	OUTPATIENT
1744	May	20.1	OUTPATIENT
1745	May	24.5	OUTPATIENT
1746	May	32.99	OUTPATIENT
1747	May	21.31	OUTPATIENT
1748	May	18.93	OUTPATIENT
1749	May	28.29	OUTPATIENT
1750	May	31.44	OUTPATIENT
1751	May	24.32	OUTPATIENT
1752	May	25.42	EMERGENCY PATIENT
1753	May	19.47	OUTPATIENT
1754	May	19.51	OUTPATIENT
1755	May	22.31	OUTPATIENT
1756	May	35.21	OUTPATIENT
1757	May	20.71	OUTPATIENT
1758	May	21.5	OUTPATIENT
1759	May	18.76	OUTPATIENT
1760	May	27.52	OUTPATIENT
1761	May	32.62	EMERGENCY PATIENT
1762	May	27.03	OUTPATIENT
1763	May	30.12	OUTPATIENT
1764	May	22.92	OUTPATIENT
1765	May	19.03	EMERGENCY PATIENT
1766	May	22.45	OUTPATIENT
1767	May	23.77	OUTPATIENT
1768	May	25.2	OUTPATIENT
1769	May	19.31	EMERGENCY PATIENT
1770	May	30.32	OUTPATIENT
1771	May	35.82	EMERGENCY PATIENT
1772	May	24.74	OUTPATIENT
1773	May	27.7	OUTPATIENT
1774	May	30.34	OUTPATIENT
1775	May	32.23	OUTPATIENT
1776	May	24.85	OUTPATIENT
1777	May	26.89	OUTPATIENT
1778	May	35.44	OUTPATIENT
1779	May	24.9	OUTPATIENT
1780	May	29.07	OUTPATIENT
1781	May	26.52	EMERGENCY PATIENT
1782	May	15.07	EMERGENCY PATIENT
1783	May	15.76	EMERGENCY PATIENT
1784	May	20.36	EMERGENCY PATIENT
1785	May	21.99	EMERGENCY PATIENT
1786	May	20.9	EMERGENCY PATIENT
1787	May	30.92	EMERGENCY PATIENT
1788	May	23.66	EMERGENCY PATIENT
1789	May	22.78	EMERGENCY PATIENT
1790	May	32.28	EMERGENCY PATIENT
1791	May	15.8	EMERGENCY PATIENT
1792	May	37.71	OUTPATIENT
1793	May	29.46	EMERGENCY PATIENT
1794	May	28.33	EMERGENCY PATIENT
1795	May	32.56	OUTPATIENT
1796	May	22.94	OUTPATIENT
1797	May	29.35	OUTPATIENT
1798	May	31.59	OUTPATIENT
1799	May	20.3	OUTPATIENT
1800	May	21.91	OUTPATIENT
1801	May	37.33	OUTPATIENT
1802	May	34.99	OUTPATIENT
1803	May	26.26	OUTPATIENT
1804	May	28.34	OUTPATIENT
1805	May	25.04	OUTPATIENT
1806	May	16.16	OUTPATIENT
1807	May	31.9	OUTPATIENT
1808	May	34.23	OUTPATIENT
1809	May	37.99	OUTPATIENT
1810	May	20.75	OUTPATIENT
1811	May	24.72	OUTPATIENT
1812	May	23.5	OUTPATIENT
1813	May	29.06	OUTPATIENT
1814	May	21.29	OUTPATIENT
1815	May	19.19	OUTPATIENT
1816	May	20.88	OUTPATIENT
1817	May	23.91	OUTPATIENT
1818	May	29.76	OUTPATIENT
1819	May	22.39	OUTPATIENT
1820	May	18.3	OUTPATIENT
1821	May	33.1	OUTPATIENT
1822	May	33.11	OUTPATIENT
1823	May	37.42	OUTPATIENT
1824	May	35.26	OUTPATIENT
1825	May	31.38	OUTPATIENT
1826	May	19.07	OUTPATIENT
1827	May	25.5	OUTPATIENT
1828	May	27	OUTPATIENT
1829	May	18.66	OUTPATIENT
1830	May	30.97	OUTPATIENT
1831	May	17.89	OUTPATIENT
1832	May	24.21	OUTPATIENT
1833	May	20.41	OUTPATIENT
1834	May	39.15	OUTPATIENT
1835	May	34.69	OUTPATIENT
1836	May	30.36	OUTPATIENT
1837	May	18.2	OUTPATIENT
1838	May	20.37	OUTPATIENT
1839	May	25.43	OUTPATIENT
1840	May	17.71	OUTPATIENT
1841	May	37.56	OUTPATIENT
1842	May	26.37	OUTPATIENT
1843	May	17.36	OUTPATIENT
1844	May	29.09	OUTPATIENT
1845	May	29.51	OUTPATIENT
1846	May	22.11	EMERGENCY PATIENT
1847	May	24.56	EMERGENCY PATIENT
1848	May	35.26	EMERGENCY PATIENT
1849	May	16.06	EMERGENCY PATIENT
1850	May	28.48	EMERGENCY PATIENT
1851	May	18.99	OUTPATIENT
1852	May	15.1	OUTPATIENT
1853	May	32.48	OUTPATIENT
1854	May	24.38	EMERGENCY PATIENT
1855	May	27.26	EMERGENCY PATIENT
1856	May	18.35	EMERGENCY PATIENT
1857	May	27.95	OUTPATIENT
1858	May	23.53	HOSPITALIZED PATIENT
1859	May	22.37	OUTPATIENT
1860	May	24.46	OUTPATIENT
1861	May	16.48	OUTPATIENT
1862	May	13.93	EMERGENCY PATIENT
1863	May	20.19	OUTPATIENT
1864	May	31.16	OUTPATIENT
1865	May	33.65	OUTPATIENT
1866	May	17.96	OUTPATIENT
1867	May	19.5	EMERGENCY PATIENT
1868	May	19.61	EMERGENCY PATIENT
1869	May	23.98	OUTPATIENT
1870	May	38.41	OUTPATIENT
1871	May	30.45	OUTPATIENT
1872	May	36.76	OUTPATIENT
1873	May	21.32	EMERGENCY PATIENT
1874	May	25.52	OUTPATIENT
1875	May	16.77	EMERGENCY PATIENT
1876	May	18.34	OUTPATIENT
1877	May	28.75	OUTPATIENT
1878	May	23.04	OUTPATIENT
1879	May	15.07	OUTPATIENT
1880	May	16.57	OUTPATIENT
1881	May	33.06	OUTPATIENT
1882	May	19.76	OUTPATIENT
1883	May	23.39	OUTPATIENT
1884	May	22.13	OUTPATIENT
1885	May	19.06	EMERGENCY PATIENT
1886	May	17.85	OUTPATIENT
1887	May	19.5	EMERGENCY PATIENT
1888	May	26.19	EMERGENCY PATIENT
1889	May	25.11	OUTPATIENT
1890	May	32.13	EMERGENCY PATIENT
1891	May	25.61	EMERGENCY PATIENT
1892	May	14.23	OUTPATIENT
1893	May	24.48	OUTPATIENT
1894	May	30.84	EMERGENCY PATIENT
1895	May	35.04	OUTPATIENT
1896	May	18.36	OUTPATIENT
1897	May	30.34	OUTPATIENT
1898	May	31.29	OUTPATIENT
1899	May	25	EMERGENCY PATIENT
1900	May	23.96	OUTPATIENT
1901	May	26.03	EMERGENCY PATIENT
1902	May	19.39	OUTPATIENT
1903	May	29.6	OUTPATIENT
1904	May	28.59	EMERGENCY PATIENT
1905	May	31.88	OUTPATIENT
1906	May	31.87	OUTPATIENT
1907	May	29.49	OUTPATIENT
1908	May	17.9	HOSPITALIZED PATIENT
1909	May	32.48	EMERGENCY PATIENT
1910	May	16.62	EMERGENCY PATIENT
1911	May	14.94	EMERGENCY PATIENT
1912	May	31.76	EMERGENCY PATIENT
1913	May	19.12	OUTPATIENT
1914	May	34.87	OUTPATIENT
1915	May	16.26	OUTPATIENT
1916	May	37.05	OUTPATIENT
1917	May	20.68	OUTPATIENT
1918	May	28.41	OUTPATIENT
1919	May	25.39	OUTPATIENT
1920	May	16.09	OUTPATIENT
1921	May	18.93	OUTPATIENT
1922	May	16.7	OUTPATIENT
1923	May	26.79	EMERGENCY PATIENT
1924	May	21.74	EMERGENCY PATIENT
1925	May	33.59	EMERGENCY PATIENT
1926	May	20.19	EMERGENCY PATIENT
1927	May	20.05	OUTPATIENT
1928	May	24.1	EMERGENCY PATIENT
1929	May	33.66	EMERGENCY PATIENT
1930	May	17.49	OUTPATIENT
1931	May	24.28	OUTPATIENT
1932	May	29.25	OUTPATIENT
1933	May	36.75	EMERGENCY PATIENT
1934	May	17.01	EMERGENCY PATIENT
1935	May	24.91	OUTPATIENT
1936	May	27.61	OUTPATIENT
1937	May	20.68	EMERGENCY PATIENT
1938	May	19.42	OUTPATIENT
1939	May	27.22	OUTPATIENT
1940	May	33.11	EMERGENCY PATIENT
1941	May	27.19	EMERGENCY PATIENT
1942	May	31.43	EMERGENCY PATIENT
1943	May	23.81	EMERGENCY PATIENT
1944	May	35.27	EMERGENCY PATIENT
1945	May	18.63	EMERGENCY PATIENT
1946	May	28.67	EMERGENCY PATIENT
1947	May	23.69	EMERGENCY PATIENT
1948	May	37.34	EMERGENCY PATIENT
1949	May	26.83	EMERGENCY PATIENT
1950	May	26	EMERGENCY PATIENT
1951	May	25.59	EMERGENCY PATIENT
1952	May	29.64	EMERGENCY PATIENT
1953	May	15.45	EMERGENCY PATIENT
1954	May	21.7	EMERGENCY PATIENT
1955	May	31.68	EMERGENCY PATIENT
1956	May	23.64	EMERGENCY PATIENT
1957	May	26.88	EMERGENCY PATIENT
1958	May	16.14	EMERGENCY PATIENT
1959	May	21.37	EMERGENCY PATIENT
1960	May	17.85	EMERGENCY PATIENT
1961	May	26.9	EMERGENCY PATIENT
1962	May	8.24	EMERGENCY PATIENT
1963	May	21.04	EMERGENCY PATIENT
1964	May	17.7	EMERGENCY PATIENT
1965	May	29.49	EMERGENCY PATIENT
1966	May	38.91	HOSPITALIZED PATIENT
1967	May	18.46	EMERGENCY PATIENT
1968	May	26.96	EMERGENCY PATIENT
1969	May	29.66	EMERGENCY PATIENT
1970	May	19.59	EMERGENCY PATIENT
1971	May	26.9	EMERGENCY PATIENT
1972	May	19.9	OUTPATIENT
1973	May	9.12	EMERGENCY PATIENT
1974	May	29.42	OUTPATIENT
1975	May	24.77	OUTPATIENT
1976	May	30.34	EMERGENCY PATIENT
1977	May	28.12	HOSPITALIZED PATIENT
1978	May	28.77	EMERGENCY PATIENT
1979	May	27.53	EMERGENCY PATIENT
1980	May	16.83	OUTPATIENT
1981	May	25.71	OUTPATIENT
1982	May	30.83	OUTPATIENT
1983	May	22.94	OUTPATIENT
1984	May	23.82	OUTPATIENT
1985	May	25.53	OUTPATIENT
1986	May	27.04	EMERGENCY PATIENT
1987	May	23.37	OUTPATIENT
1988	May	18.7	EMERGENCY PATIENT
1989	May	21.01	OUTPATIENT
1990	May	19.36	OUTPATIENT
1991	May	29.74	OUTPATIENT
1992	May	21.07	OUTPATIENT
1993	May	33.76	EMERGENCY PATIENT
1994	May	25.15	EMERGENCY PATIENT
1995	May	26.34	EMERGENCY PATIENT
1996	May	26.32	EMERGENCY PATIENT
1997	May	17.46	OUTPATIENT
[truncated: 5,572 more rows]
