# Supplementary figures and images for: Smartphone screen testing, a novel pre-diagnostic method to identify SARS-CoV-2 infectious individuals
Source: eLife journal article supplement (doi:10.7554/elife.70333), 2021-06-22

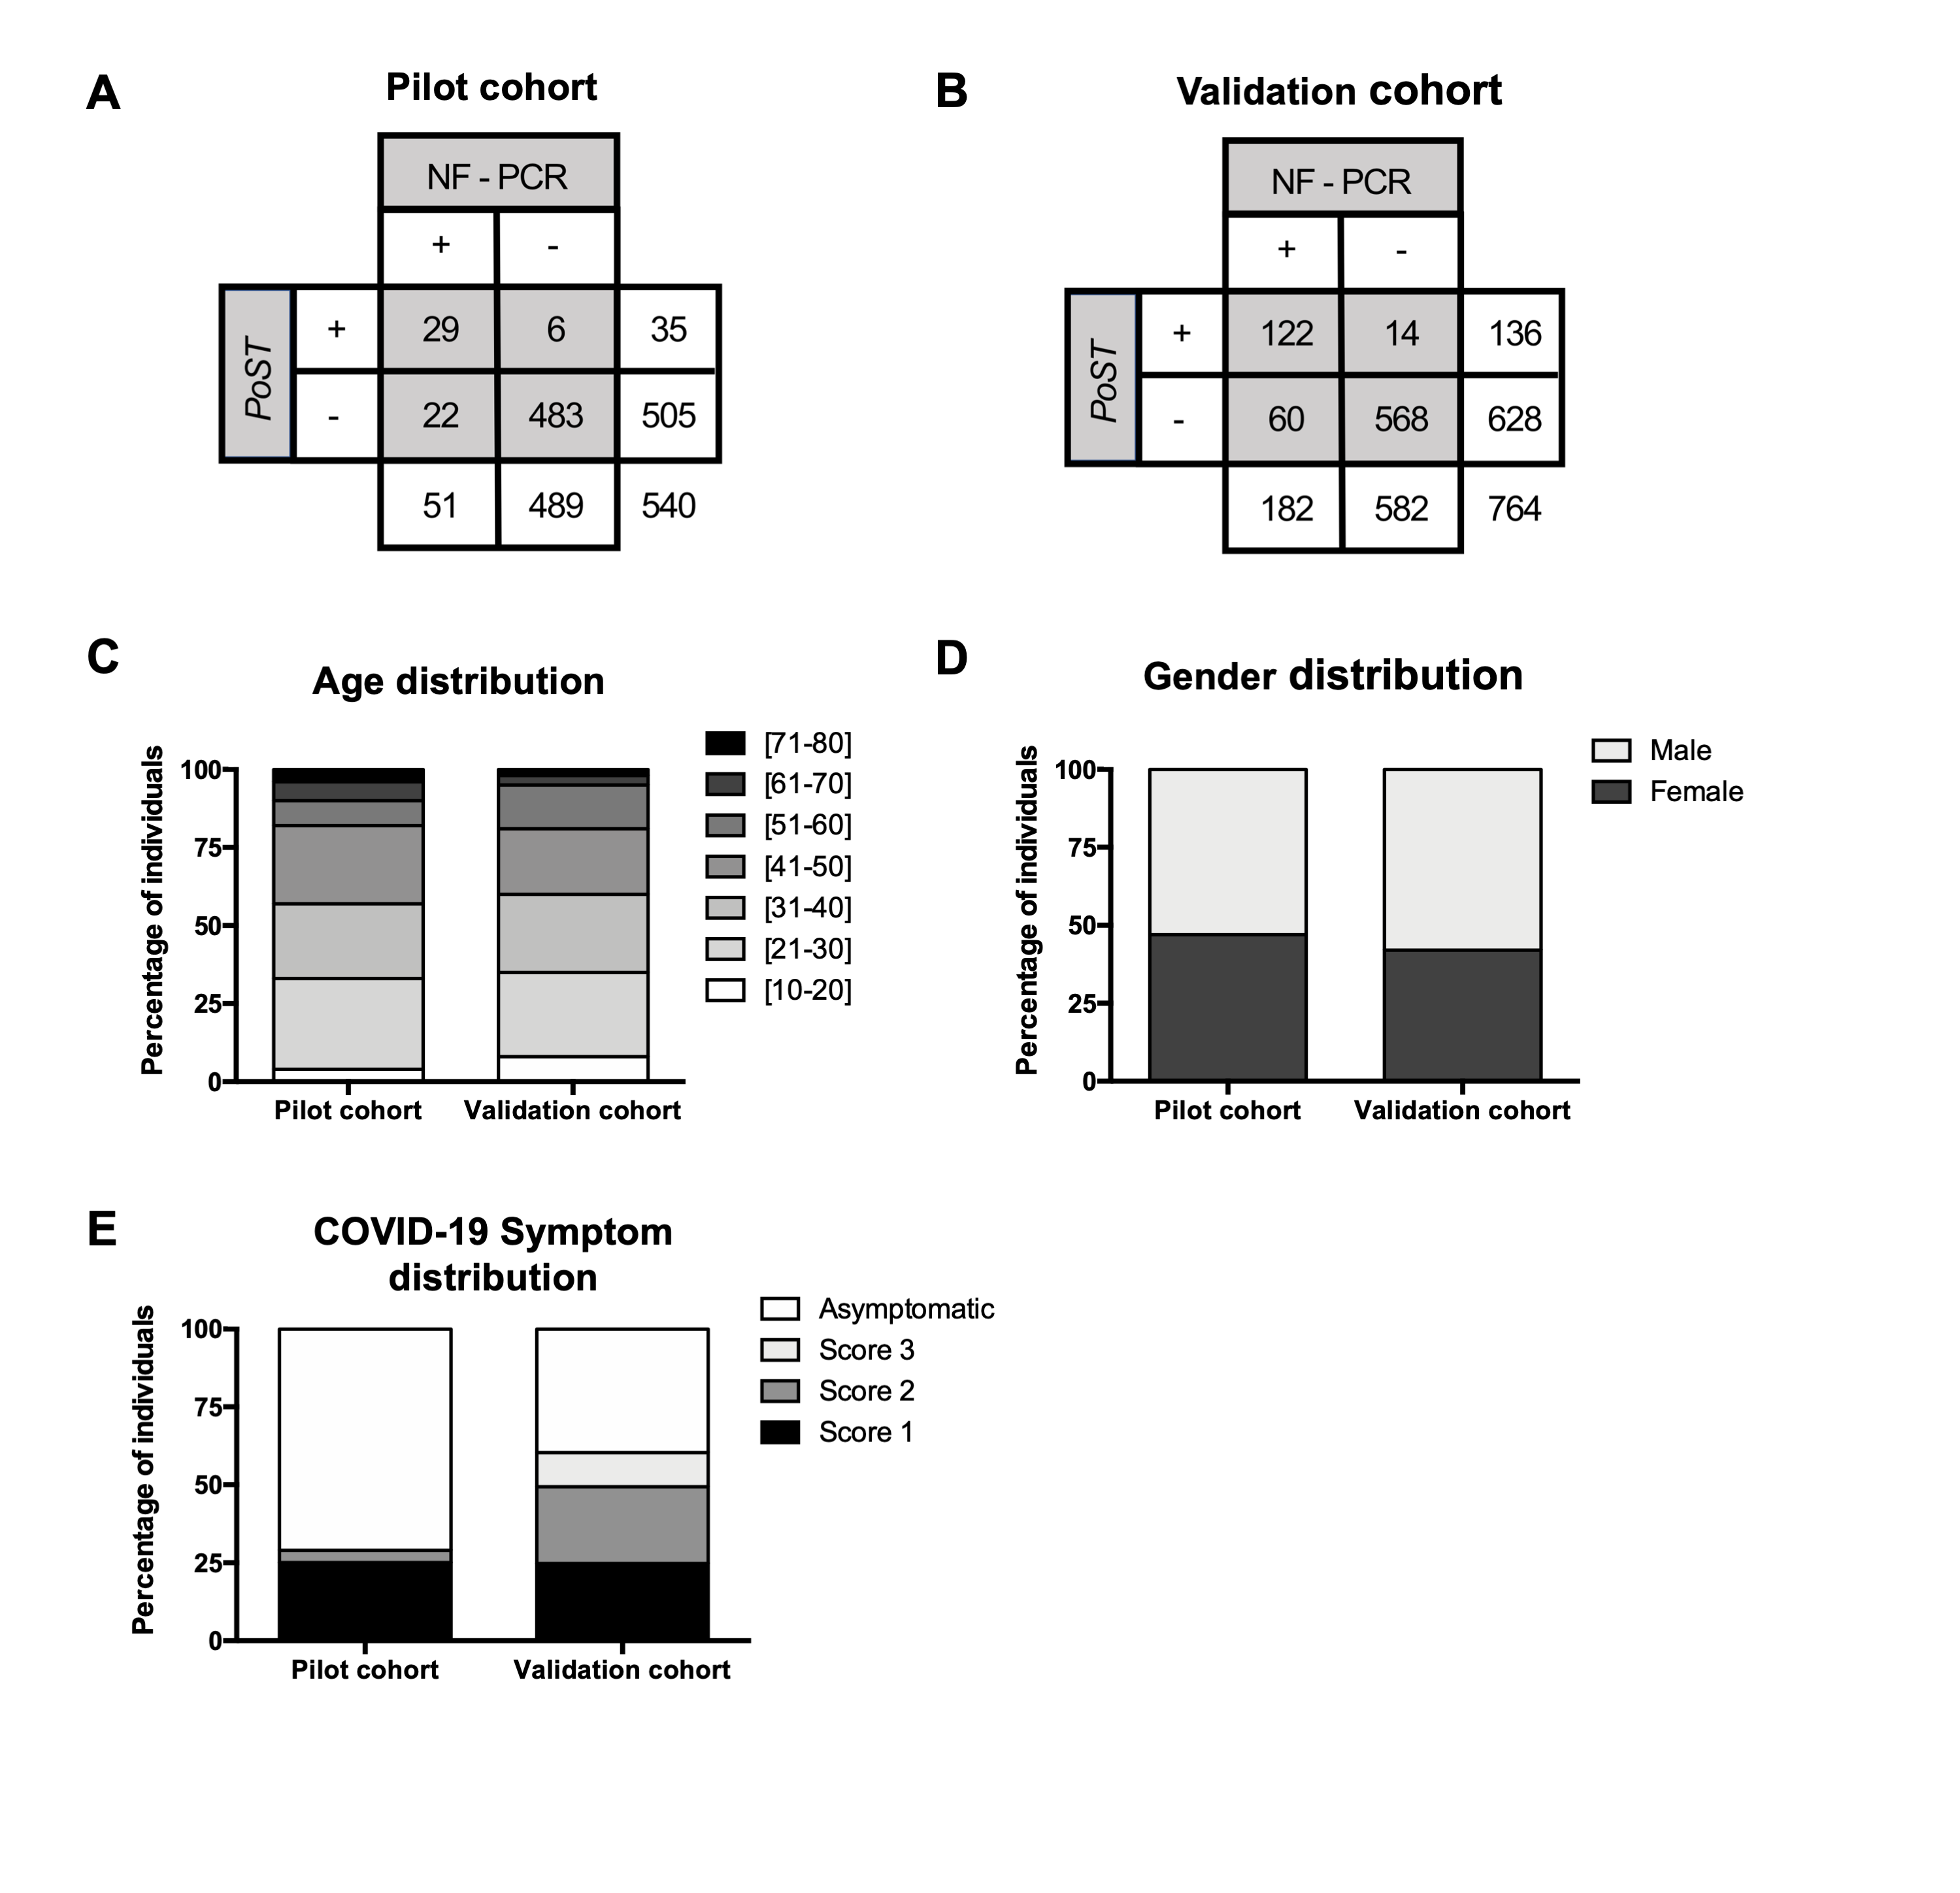

Supplement: supp [file elife-70333-supp-v1.zip › elife_poa_e70333_Figure_1_figure_supplement_1.png]

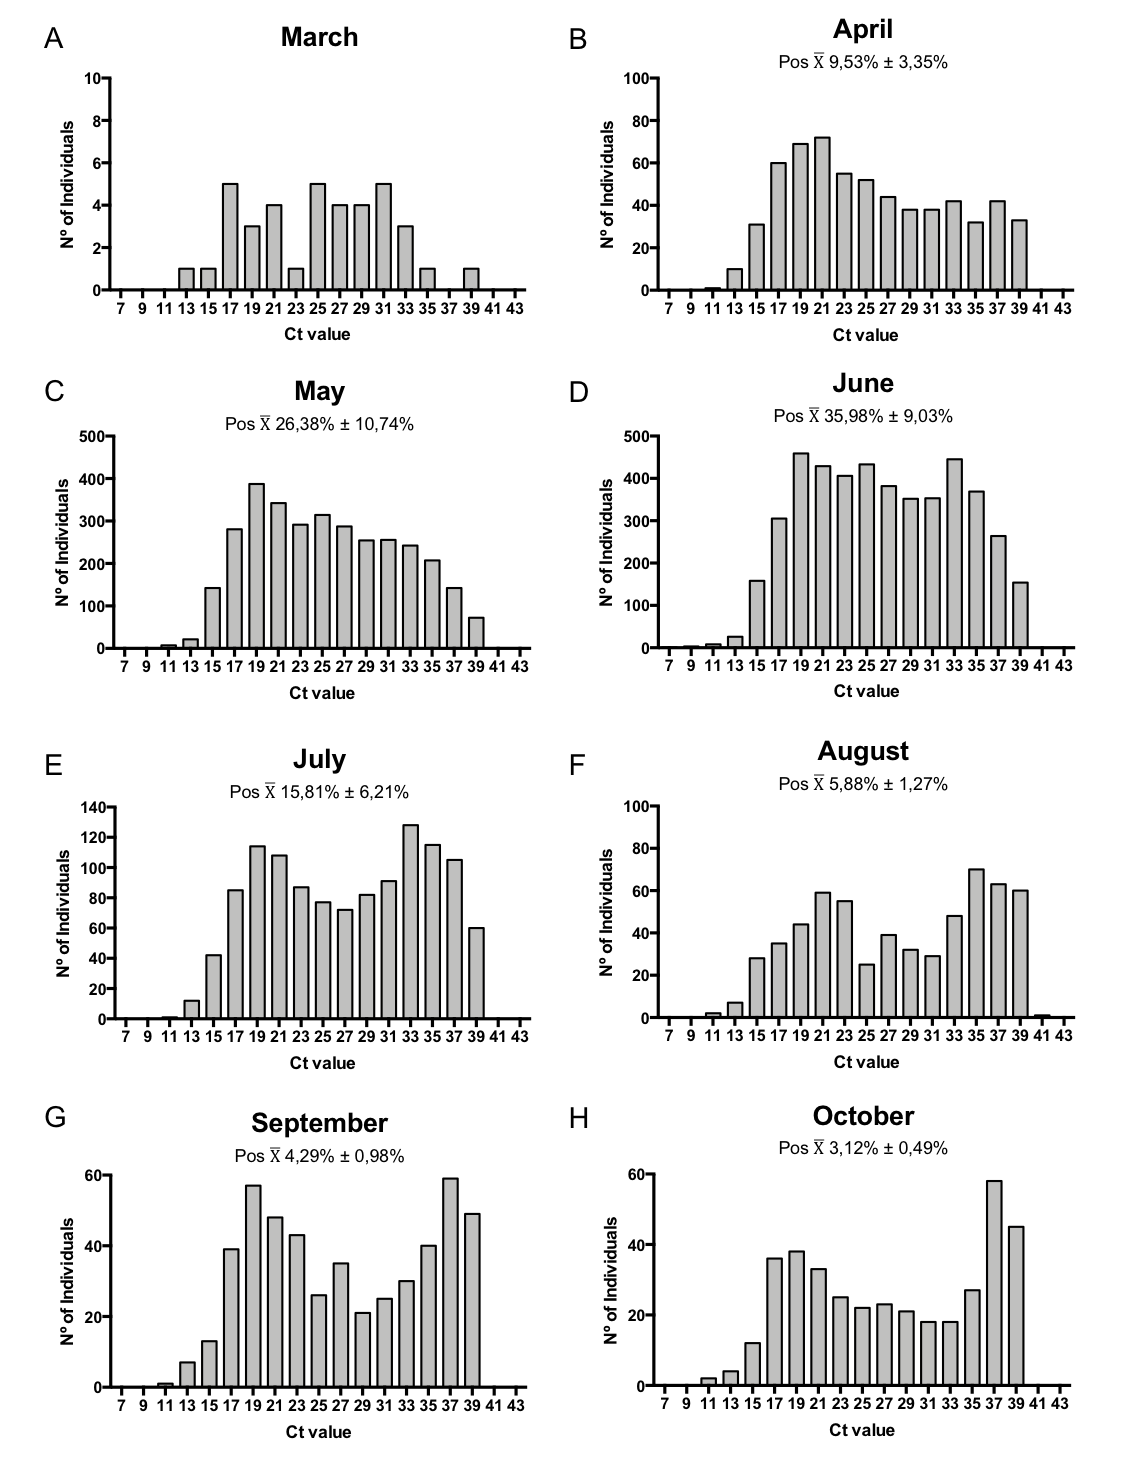

Supplement: supp [file elife-70333-supp-v1.zip › elife_poa_e70333_Figure_2_figure_supplement_2.png]
